# Supplementary material
Source: MDPI journal article supplement (https://www.mdpi.com/2078-2489/9/3/66)
Supplement: s1 [file s1]

	player_id	assists	deaths	kills	gold_earned
0	60412503	12.0	2.0	19.0	15533.0
1	60412503	7.0	2.0	5.0	9743.0
2	60412503	8.0	4.0	5.0	8414.0
3	60412503	10.0	9.0	5.0	13977.0
4	60412503	8.0	6.0	7.0	12836.0
5	60412503	15.0	14.0	16.0	23712.0
6	60412503	3.0	10.0	9.0	12816.0
7	60412503	20.0	5.0	12.0	19152.0
8	60412503	10.0	9.0	17.0	17023.0
9	60412503	14.0	5.0	14.0	18155.0
10	60412503	12.0	7.0	16.0	15246.0
11	60412503	10.0	12.0	10.0	15621.0
12	60412503	0.0	3.0	4.0	6541.0
13	60412503	16.0	9.0	10.0	17240.0
14	60412503	5.0	3.0	17.0	14849.0
15	60412503	7.0	8.0	8.0	12901.0
16	60412503	6.0	3.0	17.0	15140.0
17	60412503	1.0	8.0	3.0	6068.0
18	60412503	6.0	6.0	13.0	17421.0
19	60412503	3.0	6.0	8.0	10456.0
20	60412503	13.0	10.0	12.0	15637.0
21	60412503	24.0	10.0	3.0	11978.0
22	60412503	7.0	4.0	16.0	13001.0
23	60412503	16.0	6.0	0.0	9327.0
24	60412503	2.0	3.0	11.0	9507.0
25	60412503	0.0	6.0	23.0	19678.0
26	60412503	9.0	14.0	12.0	20552.0
27	60412503	9.0	4.0	13.0	12116.0
28	60412503	13.0	10.0	12.0	13036.0
29	60412503	15.0	6.0	16.0	17371.0
30	60412503	11.0	9.0	14.0	17529.0
31	60412503	9.0	1.0	9.0	10090.0
32	60412503	4.0	2.0	13.0	12805.0
33	60412503	11.0	3.0	11.0	13783.0
34	60412503	16.0	17.0	5.0	13386.0
35	60412503	7.0	2.0	15.0	13381.0
36	60412503	4.0	1.0	14.0	12716.0
37	60412503	1.0	3.0	8.0	10683.0
38	60412503	10.0	8.0	9.0	13699.0
39	60412503	7.0	7.0	15.0	16217.0
40	60412503	5.0	11.0	4.0	8773.0
41	60412503	17.0	7.0	7.0	14750.0
42	60412503	5.0	8.0	3.0	8913.0
43	60412503	12.0	7.0	4.0	11729.0
44	60412503	20.0	8.0	7.0	17185.0
45	60412503	9.0	7.0	6.0	14688.0
46	60412503	4.0	7.0	3.0	7587.0
47	60412503	18.0	11.0	8.0	17675.0
48	60412503	13.0	10.0	11.0	15616.0
49	60412503	3.0	8.0	6.0	8423.0
50	60412503	10.0	10.0	12.0	14584.0
51	60412503	11.0	2.0	6.0	10258.0
52	60412503	11.0	3.0	7.0	12995.0
53	60412503	10.0	3.0	8.0	10761.0
54	60412503	6.0	1.0	9.0	8953.0
55	60412503	13.0	3.0	0.0	7271.0
56	60412503	0.0	1.0	9.0	9410.0
57	60412503	12.0	12.0	6.0	13100.0
58	60412503	8.0	4.0	8.0	12079.0
59	60412503	17.0	6.0	7.0	14047.0
60	60412503	8.0	5.0	5.0	12878.0
61	60412503	6.0	2.0	2.0	8135.0
62	60412503	11.0	12.0	8.0	11537.0
63	60412503	20.0	5.0	5.0	16595.0
64	60412503	5.0	2.0	2.0	7669.0
65	60412503	9.0	8.0	4.0	13546.0
66	60412503	11.0	10.0	10.0	16102.0
67	60412503	9.0	0.0	5.0	11666.0
68	60412503	3.0	12.0	2.0	9329.0
69	60412503	5.0	1.0	2.0	7020.0
70	60412503	8.0	2.0	2.0	9171.0
71	60412503	11.0	4.0	4.0	10732.0
72	60412503	11.0	11.0	5.0	15308.0
73	60412503	2.0	9.0	3.0	12159.0
74	60412503	6.0	2.0	1.0	7054.0
75	60412503	12.0	5.0	2.0	11873.0
76	60412503	5.0	0.0	4.0	8394.0
77	60412503	13.0	7.0	7.0	13605.0
78	60412503	18.0	2.0	9.0	11993.0
79	60412503	16.0	9.0	6.0	14827.0
80	60412503	13.0	4.0	6.0	11890.0
81	60412503	9.0	4.0	4.0	11264.0
82	60412503	6.0	7.0	4.0	8400.0
83	60412503	2.0	6.0	2.0	7431.0
84	60412503	4.0	4.0	0.0	8978.0
85	60412503	12.0	5.0	8.0	15084.0
86	60412503	2.0	5.0	3.0	6955.0
87	60412503	20.0	7.0	3.0	15523.0
88	60412503	8.0	8.0	3.0	9454.0
89	60412503	8.0	6.0	4.0	10254.0
90	60412503	11.0	9.0	1.0	11640.0
91	60412503	2.0	5.0	7.0	11524.0
92	60412503	12.0	10.0	7.0	15010.0
93	60412503	10.0	11.0	3.0	11215.0
94	60412503	17.0	7.0	5.0	13687.0
95	60412503	10.0	9.0	3.0	10362.0
96	60412503	7.0	3.0	2.0	10047.0
97	60412503	29.0	21.0	7.0	25098.0
98	60412503	10.0	5.0	3.0	11591.0
99	60412503	9.0	9.0	2.0	8240.0
100	48013821	6.0	9.0	5.0	9170.0
101	48013821	1.0	7.0	0.0	7189.0
102	48013821	19.0	2.0	2.0	8869.0
103	48013821	9.0	1.0	4.0	10342.0
104	48013821	11.0	4.0	6.0	13054.0
105	48013821	1.0	2.0	8.0	10235.0
106	48013821	8.0	1.0	9.0	11279.0
107	48013821	14.0	11.0	9.0	16056.0
108	48013821	5.0	0.0	8.0	8211.0
109	48013821	2.0	3.0	8.0	7378.0
110	48013821	14.0	8.0	12.0	14936.0
111	48013821	5.0	2.0	6.0	11984.0
112	48013821	12.0	4.0	4.0	11670.0
113	48013821	10.0	1.0	7.0	8910.0
114	48013821	13.0	13.0	15.0	15244.0
115	48013821	26.0	3.0	10.0	15187.0
116	48013821	10.0	1.0	7.0	9628.0
117	48013821	5.0	10.0	10.0	11617.0
118	48013821	20.0	10.0	5.0	12687.0
119	48013821	6.0	1.0	9.0	9646.0
120	48013821	6.0	10.0	1.0	7877.0
121	48013821	14.0	6.0	4.0	11471.0
122	48013821	18.0	2.0	4.0	10249.0
123	48013821	17.0	2.0	7.0	14490.0
124	48013821	22.0	8.0	5.0	15597.0
125	48013821	8.0	8.0	10.0	13065.0
126	48013821	22.0	4.0	1.0	8730.0
127	48013821	5.0	6.0	2.0	9186.0
128	48013821	0.0	4.0	1.0	5485.0
129	48013821	13.0	9.0	13.0	15584.0
130	48013821	7.0	0.0	4.0	7271.0
131	48013821	10.0	1.0	0.0	5475.0
132	48013821	12.0	5.0	5.0	10762.0
133	48013821	10.0	5.0	14.0	16001.0
134	48013821	13.0	6.0	15.0	17024.0
135	48013821	21.0	7.0	10.0	14575.0
136	48013821	20.0	1.0	2.0	10362.0
137	48013821	17.0	4.0	7.0	16882.0
138	48013821	5.0	6.0	10.0	12696.0
139	48013821	7.0	4.0	5.0	10937.0
140	48013821	4.0	2.0	6.0	12268.0
141	48013821	16.0	5.0	7.0	11973.0
142	48013821	29.0	10.0	1.0	10375.0
143	48013821	16.0	3.0	2.0	9812.0
144	48013821	24.0	5.0	2.0	11217.0
145	48013821	9.0	4.0	0.0	6932.0
146	48013821	6.0	12.0	8.0	15433.0
147	48013821	15.0	2.0	2.0	8314.0
148	48013821	4.0	10.0	3.0	8501.0
149	48013821	7.0	5.0	11.0	17251.0
150	48013821	10.0	6.0	5.0	10064.0
151	48013821	7.0	6.0	3.0	11894.0
152	48013821	17.0	3.0	6.0	11060.0
153	48013821	1.0	4.0	5.0	8693.0
154	48013821	5.0	9.0	7.0	13859.0
155	48013821	15.0	4.0	7.0	15201.0
156	48013821	9.0	6.0	4.0	10308.0
157	48013821	9.0	9.0	10.0	16633.0
158	48013821	2.0	4.0	2.0	7217.0
159	48013821	9.0	7.0	1.0	9585.0
160	48013821	3.0	5.0	5.0	9672.0
161	48013821	17.0	8.0	1.0	11586.0
162	48013821	1.0	4.0	6.0	14689.0
163	48013821	9.0	3.0	1.0	7709.0
164	48013821	11.0	2.0	0.0	8171.0
165	48013821	14.0	1.0	3.0	8186.0
166	48013821	15.0	4.0	0.0	9269.0
167	48013821	23.0	3.0	1.0	10462.0
168	48013821	16.0	5.0	0.0	10420.0
169	48013821	14.0	4.0	3.0	8639.0
170	48013821	7.0	8.0	1.0	8401.0
171	48013821	6.0	6.0	9.0	13222.0
172	48013821	7.0	2.0	5.0	11374.0
173	48013821	1.0	6.0	6.0	11804.0
174	48013821	4.0	3.0	6.0	10197.0
175	48013821	4.0	0.0	12.0	13022.0
176	48013821	6.0	5.0	9.0	15721.0
177	48013821	0.0	3.0	7.0	7527.0
178	48013821	3.0	2.0	8.0	9201.0
179	48013821	8.0	5.0	7.0	12058.0
180	48013821	3.0	4.0	3.0	8898.0
181	48013821	10.0	8.0	16.0	16534.0
182	48013821	2.0	5.0	3.0	11311.0
183	48013821	7.0	2.0	7.0	13334.0
184	48013821	3.0	5.0	3.0	8594.0
185	48013821	8.0	2.0	3.0	12155.0
186	48013821	9.0	2.0	12.0	13542.0
187	48013821	23.0	6.0	7.0	15588.0
188	48013821	13.0	4.0	11.0	15902.0
189	48013821	7.0	5.0	6.0	10950.0
190	48013821	5.0	2.0	10.0	12696.0
191	48013821	9.0	6.0	14.0	19448.0
192	48013821	1.0	6.0	5.0	9274.0
193	48013821	18.0	11.0	2.0	12773.0
194	48013821	4.0	6.0	0.0	5989.0
195	48013821	1.0	5.0	4.0	7531.0
196	48013821	6.0	7.0	6.0	12761.0
197	48013821	11.0	6.0	12.0	14699.0
198	48013821	6.0	3.0	11.0	13032.0
199	48013821	9.0	7.0	12.0	14002.0
200	34999026	7.0	3.0	15.0	13831.0
201	34999026	13.0	4.0	18.0	17991.0
202	34999026	13.0	2.0	11.0	14977.0
203	34999026	7.0	4.0	15.0	16831.0
204	34999026	3.0	2.0	5.0	8380.0
205	34999026	2.0	3.0	6.0	10498.0
206	34999026	8.0	12.0	5.0	11290.0
207	34999026	1.0	7.0	4.0	11047.0
208	34999026	2.0	4.0	6.0	13000.0
209	34999026	1.0	4.0	11.0	13087.0
210	34999026	2.0	2.0	10.0	10599.0
211	34999026	7.0	8.0	13.0	14714.0
212	34999026	5.0	6.0	7.0	13504.0
213	34999026	4.0	11.0	13.0	20412.0
214	34999026	7.0	6.0	10.0	13708.0
215	34999026	5.0	2.0	8.0	13186.0
216	34999026	13.0	5.0	3.0	14125.0
217	34999026	4.0	4.0	3.0	7916.0
218	34999026	11.0	10.0	7.0	13249.0
219	34999026	17.0	12.0	10.0	15959.0
220	34999026	9.0	8.0	5.0	15614.0
221	34999026	2.0	7.0	3.0	9649.0
222	34999026	8.0	5.0	17.0	17631.0
223	34999026	0.0	6.0	7.0	15344.0
224	34999026	13.0	11.0	13.0	16457.0
225	34999026	3.0	7.0	4.0	9008.0
226	34999026	8.0	3.0	12.0	16148.0
227	34999026	20.0	4.0	0.0	10340.0
228	34999026	2.0	3.0	0.0	5401.0
229	34999026	9.0	10.0	0.0	6487.0
230	34999026	5.0	2.0	5.0	8849.0
231	34999026	8.0	5.0	9.0	14549.0
232	34999026	18.0	8.0	10.0	17351.0
233	34999026	10.0	2.0	4.0	8313.0
234	34999026	4.0	8.0	17.0	16437.0
235	34999026	15.0	3.0	4.0	12622.0
236	34999026	14.0	6.0	11.0	19617.0
237	34999026	5.0	8.0	5.0	12679.0
238	34999026	5.0	4.0	17.0	17299.0
239	34999026	4.0	5.0	18.0	14696.0
240	34999026	7.0	6.0	9.0	13587.0
241	34999026	10.0	2.0	10.0	12931.0
242	34999026	14.0	8.0	0.0	10701.0
243	34999026	4.0	12.0	7.0	11091.0
244	34999026	12.0	10.0	9.0	15449.0
245	34999026	6.0	9.0	5.0	11412.0
246	34999026	6.0	4.0	11.0	18045.0
247	34999026	9.0	9.0	5.0	15481.0
248	34999026	10.0	3.0	14.0	17334.0
249	34999026	21.0	8.0	9.0	19751.0
250	34999026	18.0	8.0	4.0	15518.0
251	34999026	7.0	7.0	5.0	14819.0
252	34999026	6.0	1.0	4.0	8443.0
253	34999026	7.0	3.0	12.0	19580.0
254	34999026	8.0	14.0	13.0	20818.0
255	34999026	9.0	7.0	7.0	13015.0
256	34999026	10.0	5.0	17.0	16897.0
257	34999026	6.0	1.0	10.0	10080.0
258	34999026	6.0	8.0	6.0	8643.0
259	34999026	9.0	12.0	9.0	20226.0
260	34999026	9.0	6.0	2.0	12863.0
261	34999026	5.0	4.0	6.0	9322.0
262	34999026	10.0	5.0	22.0	21573.0
263	34999026	3.0	11.0	3.0	10002.0
264	34999026	6.0	3.0	7.0	17001.0
265	34999026	10.0	3.0	3.0	9885.0
266	34999026	5.0	2.0	12.0	13820.0
267	34999026	4.0	5.0	5.0	11200.0
268	34999026	7.0	2.0	8.0	12009.0
269	34999026	7.0	7.0	10.0	15872.0
270	34999026	0.0	1.0	0.0	756.0
271	34999026	0.0	0.0	0.0	882.0
272	34999026	5.0	11.0	5.0	11502.0
273	34999026	11.0	11.0	13.0	19262.0
274	34999026	5.0	6.0	11.0	15085.0
275	34999026	3.0	6.0	9.0	15579.0
276	34999026	0.0	9.0	8.0	10210.0
277	34999026	2.0	5.0	8.0	13216.0
278	34999026	14.0	2.0	6.0	9869.0
279	34999026	5.0	7.0	16.0	18591.0
280	34999026	12.0	6.0	6.0	17177.0
281	34999026	6.0	4.0	11.0	11697.0
282	34999026	10.0	4.0	10.0	16025.0
283	34999026	10.0	12.0	9.0	13633.0
284	34999026	13.0	9.0	5.0	15547.0
285	34999026	9.0	9.0	5.0	13841.0
286	34999026	6.0	7.0	7.0	14387.0
287	34999026	6.0	7.0	7.0	17705.0
288	34999026	3.0	6.0	19.0	18566.0
289	34999026	0.0	7.0	6.0	8111.0
290	34999026	5.0	5.0	10.0	19244.0
291	34999026	11.0	4.0	7.0	15256.0
292	34999026	8.0	7.0	10.0	14547.0
293	34999026	20.0	15.0	13.0	19347.0
294	34999026	2.0	9.0	9.0	15981.0
295	34999026	19.0	3.0	4.0	14280.0
296	34999026	4.0	6.0	4.0	12263.0
297	34999026	13.0	8.0	11.0	16853.0
298	34999026	13.0	16.0	14.0	22867.0
299	34999026	5.0	10.0	3.0	9983.0
300	52312638	10.0	0.0	4.0	6495.0
301	52312638	11.0	4.0	17.0	15095.0
302	52312638	14.0	4.0	15.0	12384.0
303	52312638	7.0	1.0	4.0	9543.0
304	52312638	7.0	2.0	10.0	15217.0
305	52312638	10.0	5.0	31.0	22861.0
306	52312638	13.0	2.0	18.0	18006.0
307	52312638	5.0	3.0	11.0	11935.0
308	52312638	23.0	6.0	2.0	12123.0
309	52312638	2.0	4.0	9.0	8735.0
310	52312638	6.0	1.0	21.0	15517.0
311	52312638	2.0	1.0	8.0	8193.0
312	52312638	7.0	6.0	6.0	12725.0
313	52312638	19.0	8.0	9.0	17254.0
314	52312638	0.0	1.0	10.0	9147.0
315	52312638	12.0	10.0	20.0	18726.0
316	52312638	12.0	3.0	2.0	8021.0
317	52312638	14.0	7.0	6.0	11606.0
318	52312638	15.0	10.0	5.0	14231.0
319	52312638	9.0	3.0	10.0	9649.0
320	52312638	1.0	0.0	4.0	8095.0
321	52312638	13.0	8.0	10.0	14470.0
322	52312638	9.0	2.0	1.0	6598.0
323	52312638	8.0	5.0	9.0	13961.0
324	52312638	4.0	7.0	5.0	11728.0
325	52312638	6.0	3.0	17.0	16059.0
326	52312638	7.0	4.0	8.0	12152.0
327	52312638	8.0	1.0	5.0	13550.0
328	52312638	11.0	5.0	5.0	14973.0
329	52312638	2.0	4.0	22.0	13681.0
330	52312638	7.0	2.0	12.0	14091.0
331	52312638	2.0	4.0	6.0	10118.0
332	52312638	0.0	4.0	1.0	5652.0
333	52312638	9.0	2.0	17.0	15952.0
334	52312638	13.0	7.0	3.0	9006.0
335	52312638	11.0	4.0	3.0	8467.0
336	52312638	18.0	5.0	12.0	18821.0
337	52312638	5.0	2.0	12.0	13757.0
338	52312638	4.0	9.0	5.0	11779.0
339	52312638	5.0	5.0	19.0	18927.0
340	52312638	3.0	4.0	1.0	5460.0
341	52312638	27.0	6.0	2.0	12752.0
342	52312638	2.0	0.0	12.0	10494.0
343	52312638	3.0	2.0	10.0	8630.0
344	52312638	3.0	1.0	22.0	13715.0
345	52312638	13.0	4.0	9.0	13292.0
346	52312638	5.0	1.0	16.0	15987.0
347	52312638	18.0	7.0	9.0	14714.0
348	52312638	15.0	7.0	0.0	10106.0
349	52312638	3.0	0.0	8.0	10784.0
350	52312638	5.0	2.0	5.0	9936.0
351	52312638	16.0	5.0	14.0	16387.0
352	52312638	5.0	5.0	13.0	14216.0
353	52312638	4.0	6.0	7.0	16668.0
354	52312638	7.0	3.0	9.0	10930.0
355	52312638	10.0	6.0	14.0	24183.0
356	52312638	9.0	2.0	14.0	14594.0
357	52312638	18.0	3.0	13.0	17744.0
358	52312638	4.0	0.0	10.0	12139.0
359	52312638	4.0	3.0	20.0	16646.0
360	52312638	3.0	5.0	7.0	11612.0
361	52312638	6.0	1.0	7.0	13216.0
362	52312638	5.0	0.0	15.0	15094.0
363	52312638	5.0	2.0	8.0	13284.0
364	52312638	8.0	2.0	12.0	15054.0
365	52312638	6.0	5.0	4.0	7416.0
366	52312638	8.0	5.0	7.0	13689.0
367	52312638	9.0	5.0	15.0	18381.0
368	52312638	4.0	4.0	7.0	12132.0
369	52312638	14.0	4.0	12.0	18981.0
370	52312638	16.0	1.0	5.0	11543.0
371	52312638	9.0	1.0	13.0	13870.0
372	52312638	25.0	9.0	9.0	16957.0
373	52312638	6.0	6.0	15.0	14810.0
374	52312638	14.0	9.0	11.0	15258.0
375	52312638	5.0	2.0	11.0	11516.0
376	52312638	1.0	2.0	1.0	8201.0
377	52312638	4.0	3.0	9.0	10562.0
378	52312638	4.0	7.0	2.0	6692.0
379	52312638	1.0	1.0	10.0	12520.0
380	52312638	0.0	0.0	2.0	3465.0
381	52312638	5.0	4.0	10.0	12967.0
382	52312638	7.0	3.0	8.0	10073.0
383	52312638	17.0	1.0	3.0	10121.0
384	52312638	1.0	3.0	2.0	6412.0
385	52312638	8.0	2.0	15.0	17234.0
386	52312638	1.0	7.0	4.0	8245.0
387	52312638	0.0	0.0	0.0	3935.0
388	52312638	8.0	5.0	15.0	17288.0
389	52312638	7.0	3.0	8.0	15789.0
390	52312638	28.0	7.0	3.0	15655.0
391	52312638	9.0	6.0	8.0	13542.0
392	52312638	2.0	3.0	1.0	9504.0
393	52312638	18.0	6.0	8.0	13413.0
394	52312638	1.0	4.0	4.0	7427.0
395	52312638	2.0	5.0	10.0	10748.0
396	52312638	7.0	3.0	5.0	12704.0
397	52312638	16.0	2.0	12.0	19529.0
398	52312638	5.0	4.0	10.0	16117.0
399	52312638	7.0	5.0	0.0	7423.0
400	21262790	10.0	9.0	6.0	10277.0
401	21262790	13.0	7.0	4.0	11955.0
402	21262790	14.0	5.0	3.0	12903.0
403	21262790	8.0	2.0	5.0	11778.0
404	21262790	7.0	5.0	7.0	16351.0
405	21262790	15.0	3.0	8.0	12948.0
406	21262790	22.0	9.0	9.0	15731.0
407	21262790	18.0	5.0	8.0	16289.0
408	21262790	15.0	3.0	7.0	12874.0
409	21262790	16.0	4.0	8.0	15675.0
410	21262790	7.0	4.0	3.0	10298.0
411	21262790	13.0	4.0	8.0	14500.0
412	21262790	10.0	2.0	11.0	16591.0
413	21262790	9.0	7.0	6.0	13851.0
414	21262790	11.0	4.0	4.0	12060.0
415	21262790	9.0	4.0	11.0	16798.0
416	21262790	10.0	4.0	2.0	7537.0
417	21262790	15.0	6.0	4.0	12803.0
418	21262790	9.0	10.0	12.0	14628.0
419	21262790	9.0	8.0	3.0	8798.0
420	21262790	13.0	5.0	8.0	15893.0
421	21262790	4.0	1.0	2.0	8908.0
422	21262790	16.0	4.0	6.0	13012.0
423	21262790	14.0	3.0	7.0	17699.0
424	21262790	6.0	4.0	0.0	4530.0
425	21262790	9.0	3.0	5.0	9984.0
426	21262790	23.0	4.0	6.0	13599.0
427	21262790	12.0	9.0	4.0	11484.0
428	21262790	8.0	2.0	9.0	12100.0
429	21262790	18.0	7.0	12.0	22936.0
430	21262790	11.0	6.0	12.0	16644.0
431	21262790	4.0	9.0	3.0	11117.0
432	21262790	3.0	1.0	1.0	4967.0
433	21262790	10.0	4.0	10.0	13152.0
434	21262790	15.0	7.0	13.0	19278.0
435	21262790	10.0	1.0	12.0	15734.0
436	21262790	25.0	4.0	5.0	13949.0
437	21262790	13.0	2.0	12.0	15457.0
438	21262790	5.0	2.0	8.0	12296.0
439	21262790	11.0	8.0	6.0	13023.0
440	21262790	13.0	4.0	5.0	13467.0
441	21262790	4.0	6.0	1.0	6011.0
442	21262790	5.0	5.0	1.0	4821.0
443	21262790	8.0	1.0	7.0	10314.0
444	21262790	4.0	4.0	6.0	13366.0
445	21262790	13.0	12.0	11.0	16556.0
446	21262790	9.0	8.0	6.0	11486.0
447	21262790	13.0	11.0	7.0	11344.0
448	21262790	7.0	9.0	8.0	14525.0
449	21262790	3.0	4.0	0.0	6100.0
450	21262790	2.0	3.0	0.0	5048.0
451	21262790	13.0	0.0	2.0	13367.0
452	21262790	3.0	1.0	7.0	7942.0
453	21262790	9.0	1.0	5.0	8644.0
454	21262790	9.0	5.0	6.0	14009.0
455	21262790	13.0	7.0	4.0	12052.0
456	21262790	10.0	0.0	2.0	5947.0
457	21262790	2.0	5.0	2.0	7895.0
458	21262790	1.0	1.0	2.0	3582.0
459	21262790	2.0	1.0	9.0	9093.0
460	21262790	8.0	10.0	2.0	9807.0
461	21262790	22.0	3.0	10.0	14094.0
462	21262790	25.0	12.0	6.0	13494.0
463	21262790	9.0	2.0	21.0	16398.0
464	21262790	12.0	6.0	3.0	19554.0
465	21262790	12.0	3.0	14.0	15389.0
466	21262790	6.0	8.0	3.0	8407.0
467	21262790	5.0	2.0	9.0	10865.0
468	21262790	11.0	10.0	8.0	13488.0
469	21262790	2.0	6.0	3.0	9158.0
470	21262790	6.0	2.0	2.0	5075.0
471	21262790	9.0	1.0	5.0	8779.0
472	21262790	6.0	5.0	13.0	13054.0
473	21262790	5.0	5.0	4.0	13912.0
474	21262790	4.0	0.0	8.0	12403.0
475	21262790	0.0	2.0	4.0	6964.0
476	21262790	22.0	2.0	0.0	12221.0
477	21262790	3.0	4.0	3.0	7076.0
478	21262790	11.0	2.0	15.0	25955.0
479	21262790	4.0	6.0	5.0	8280.0
480	21262790	9.0	3.0	5.0	10240.0
481	21262790	13.0	5.0	4.0	9935.0
482	21262790	5.0	4.0	2.0	5012.0
483	21262790	13.0	3.0	4.0	8172.0
484	21262790	22.0	3.0	1.0	9127.0
485	21262790	11.0	7.0	2.0	7358.0
486	21262790	8.0	1.0	3.0	9802.0
487	21262790	6.0	2.0	15.0	10562.0
488	21262790	4.0	4.0	10.0	10121.0
489	21262790	10.0	6.0	2.0	7033.0
490	21262790	10.0	3.0	25.0	18788.0
491	21262790	17.0	9.0	7.0	16168.0
492	21262790	9.0	2.0	18.0	13948.0
493	21262790	1.0	9.0	10.0	8992.0
494	21262790	14.0	4.0	3.0	10804.0
495	21262790	5.0	5.0	5.0	10166.0
496	21262790	10.0	10.0	16.0	23628.0
497	21262790	3.0	3.0	2.0	7515.0
498	21262790	5.0	6.0	1.0	8004.0
499	21262790	4.0	6.0	3.0	11512.0
500	25416707	4.0	6.0	28.0	17027.0
501	25416707	4.0	3.0	10.0	9286.0
502	25416707	8.0	5.0	10.0	9833.0
503	25416707	15.0	7.0	13.0	20965.0
504	25416707	4.0	1.0	11.0	9968.0
505	25416707	5.0	4.0	8.0	12113.0
506	25416707	7.0	6.0	4.0	7416.0
507	25416707	9.0	8.0	9.0	14027.0
508	25416707	9.0	4.0	13.0	14878.0
509	25416707	18.0	13.0	12.0	21688.0
510	25416707	6.0	8.0	13.0	10555.0
511	25416707	8.0	3.0	9.0	12702.0
512	25416707	3.0	10.0	4.0	9032.0
513	25416707	10.0	4.0	12.0	17866.0
514	25416707	21.0	2.0	3.0	9222.0
515	25416707	18.0	2.0	3.0	9542.0
516	25416707	23.0	4.0	4.0	12516.0
517	25416707	12.0	10.0	4.0	8588.0
518	25416707	21.0	6.0	5.0	11928.0
519	25416707	17.0	7.0	22.0	19936.0
520	25416707	18.0	6.0	1.0	9012.0
521	25416707	32.0	7.0	4.0	13867.0
522	25416707	31.0	6.0	4.0	14721.0
523	25416707	36.0	7.0	3.0	14499.0
524	25416707	33.0	6.0	2.0	12389.0
525	25416707	20.0	6.0	2.0	9903.0
526	25416707	12.0	9.0	0.0	7644.0
527	25416707	14.0	2.0	5.0	12797.0
528	25416707	15.0	1.0	2.0	9529.0
529	25416707	6.0	5.0	0.0	5480.0
530	25416707	17.0	2.0	5.0	10947.0
531	25416707	13.0	4.0	0.0	6690.0
532	25416707	9.0	4.0	11.0	13581.0
533	25416707	12.0	5.0	8.0	14821.0
534	25416707	1.0	3.0	1.0	4977.0
535	25416707	4.0	6.0	2.0	8701.0
536	25416707	23.0	6.0	2.0	12954.0
537	25416707	24.0	11.0	0.0	12422.0
538	25416707	16.0	6.0	0.0	8450.0
539	25416707	11.0	7.0	2.0	11425.0
540	25416707	7.0	2.0	8.0	13653.0
541	25416707	11.0	5.0	10.0	15427.0
542	25416707	15.0	6.0	5.0	15535.0
543	25416707	13.0	1.0	11.0	17311.0
544	25416707	8.0	1.0	10.0	17512.0
545	25416707	24.0	10.0	10.0	21058.0
546	25416707	13.0	9.0	12.0	16622.0
547	25416707	13.0	7.0	4.0	12079.0
548	25416707	6.0	4.0	7.0	11656.0
549	25416707	16.0	9.0	2.0	8943.0
550	25416707	16.0	5.0	2.0	9823.0
551	25416707	5.0	5.0	6.0	14491.0
552	25416707	17.0	5.0	2.0	12203.0
553	25416707	2.0	3.0	2.0	12246.0
554	25416707	4.0	3.0	2.0	9242.0
555	25416707	18.0	2.0	2.0	9906.0
556	25416707	10.0	3.0	8.0	11828.0
557	25416707	10.0	1.0	14.0	17816.0
558	25416707	4.0	2.0	6.0	11437.0
559	25416707	8.0	2.0	7.0	9928.0
560	25416707	12.0	5.0	3.0	12941.0
561	25416707	7.0	5.0	6.0	10906.0
562	25416707	21.0	8.0	1.0	12613.0
563	25416707	6.0	5.0	0.0	7495.0
564	25416707	1.0	7.0	4.0	10571.0
565	25416707	10.0	5.0	5.0	11838.0
566	25416707	7.0	5.0	3.0	8601.0
567	25416707	17.0	8.0	11.0	19494.0
568	25416707	1.0	5.0	6.0	9221.0
569	25416707	17.0	5.0	3.0	13927.0
570	25416707	4.0	3.0	6.0	9023.0
571	25416707	3.0	6.0	6.0	14432.0
572	25416707	10.0	6.0	7.0	14947.0
573	25416707	25.0	6.0	2.0	12310.0
574	25416707	12.0	1.0	14.0	16971.0
575	25416707	15.0	4.0	2.0	9413.0
576	25416707	8.0	1.0	10.0	13828.0
577	25416707	9.0	0.0	2.0	8397.0
578	25416707	5.0	4.0	2.0	7561.0
579	25416707	12.0	4.0	5.0	13722.0
580	25416707	17.0	6.0	2.0	8958.0
581	25416707	21.0	4.0	6.0	11627.0
582	25416707	9.0	7.0	4.0	13286.0
583	25416707	12.0	2.0	14.0	18446.0
584	25416707	7.0	1.0	3.0	7846.0
585	25416707	10.0	8.0	0.0	6651.0
586	25416707	6.0	5.0	5.0	16040.0
587	25416707	9.0	1.0	3.0	9385.0
588	25416707	6.0	9.0	8.0	14881.0
589	25416707	11.0	1.0	8.0	13282.0
590	25416707	17.0	12.0	9.0	23749.0
591	25416707	11.0	5.0	8.0	13881.0
592	25416707	15.0	8.0	2.0	16115.0
593	25416707	22.0	0.0	2.0	10062.0
594	25416707	23.0	3.0	9.0	14770.0
595	25416707	4.0	6.0	9.0	11333.0
596	25416707	9.0	2.0	7.0	11074.0
597	25416707	8.0	5.0	12.0	16836.0
598	25416707	9.0	2.0	8.0	13765.0
599	25416707	12.0	3.0	10.0	14790.0
600	36368264	6.0	10.0	5.0	10617.0
601	36368264	8.0	4.0	10.0	13223.0
602	36368264	3.0	6.0	7.0	8420.0
603	36368264	9.0	4.0	13.0	14276.0
604	36368264	14.0	3.0	15.0	18855.0
605	36368264	6.0	4.0	0.0	11793.0
606	36368264	8.0	4.0	3.0	8181.0
607	36368264	2.0	3.0	3.0	6257.0
608	36368264	13.0	6.0	5.0	16457.0
609	36368264	14.0	6.0	7.0	13537.0
610	36368264	13.0	11.0	6.0	16369.0
611	36368264	6.0	7.0	3.0	11743.0
612	36368264	4.0	8.0	3.0	7613.0
613	36368264	15.0	4.0	6.0	14297.0
614	36368264	8.0	1.0	3.0	7757.0
615	36368264	11.0	6.0	5.0	15057.0
616	36368264	14.0	2.0	3.0	9042.0
617	36368264	9.0	5.0	13.0	13501.0
618	36368264	10.0	7.0	8.0	14922.0
619	36368264	5.0	3.0	12.0	13536.0
620	36368264	5.0	3.0	4.0	12103.0
621	36368264	9.0	5.0	3.0	13246.0
622	36368264	20.0	7.0	15.0	20032.0
623	36368264	11.0	2.0	3.0	9973.0
624	36368264	10.0	7.0	4.0	11260.0
625	36368264	25.0	9.0	6.0	15128.0
626	36368264	4.0	8.0	4.0	10983.0
627	36368264	2.0	0.0	3.0	7655.0
628	36368264	14.0	9.0	6.0	12581.0
629	36368264	14.0	10.0	12.0	18866.0
630	36368264	8.0	2.0	18.0	11320.0
631	36368264	9.0	3.0	9.0	12723.0
632	36368264	9.0	7.0	15.0	17324.0
633	36368264	1.0	4.0	2.0	6046.0
634	36368264	9.0	11.0	11.0	12894.0
635	36368264	20.0	8.0	0.0	11709.0
636	36368264	10.0	1.0	8.0	14287.0
637	36368264	9.0	4.0	9.0	12233.0
638	36368264	18.0	7.0	11.0	15972.0
639	36368264	18.0	6.0	13.0	13038.0
640	36368264	11.0	6.0	10.0	15158.0
641	36368264	16.0	7.0	15.0	19271.0
642	36368264	9.0	7.0	9.0	14349.0
643	36368264	3.0	6.0	0.0	5449.0
644	36368264	9.0	4.0	2.0	10637.0
645	36368264	1.0	2.0	0.0	5276.0
646	36368264	6.0	8.0	5.0	11728.0
647	36368264	5.0	7.0	1.0	7548.0
648	36368264	10.0	4.0	5.0	14279.0
649	36368264	9.0	5.0	11.0	15695.0
650	36368264	8.0	7.0	10.0	15639.0
651	36368264	8.0	5.0	19.0	14915.0
652	36368264	15.0	6.0	7.0	14206.0
653	36368264	3.0	0.0	14.0	12640.0
654	36368264	11.0	0.0	9.0	12489.0
655	36368264	10.0	6.0	12.0	14930.0
656	36368264	5.0	1.0	8.0	10245.0
657	36368264	16.0	7.0	6.0	15121.0
658	36368264	17.0	6.0	10.0	17554.0
659	36368264	7.0	6.0	8.0	12227.0
660	36368264	7.0	5.0	9.0	13024.0
661	36368264	3.0	5.0	0.0	5042.0
662	36368264	2.0	10.0	6.0	11175.0
663	36368264	8.0	7.0	14.0	16062.0
664	36368264	8.0	7.0	3.0	10028.0
665	36368264	8.0	12.0	2.0	12935.0
666	36368264	3.0	6.0	4.0	9628.0
667	36368264	13.0	6.0	13.0	15238.0
668	36368264	7.0	3.0	11.0	16118.0
669	36368264	7.0	11.0	8.0	14812.0
670	36368264	9.0	8.0	13.0	13889.0
671	36368264	11.0	8.0	14.0	15025.0
672	36368264	12.0	4.0	12.0	13743.0
673	36368264	4.0	5.0	8.0	11050.0
674	36368264	11.0	2.0	8.0	10958.0
675	36368264	4.0	6.0	13.0	14055.0
676	36368264	10.0	7.0	4.0	10285.0
677	36368264	5.0	1.0	3.0	8865.0
678	36368264	10.0	11.0	4.0	11386.0
679	36368264	10.0	9.0	8.0	14471.0
680	36368264	6.0	6.0	3.0	11174.0
681	36368264	18.0	9.0	9.0	14294.0
682	36368264	4.0	2.0	3.0	7664.0
683	36368264	12.0	5.0	7.0	11762.0
684	36368264	7.0	2.0	2.0	8914.0
685	36368264	9.0	1.0	5.0	8683.0
686	36368264	15.0	9.0	1.0	10160.0
687	36368264	22.0	7.0	8.0	13881.0
688	36368264	9.0	5.0	7.0	15127.0
689	36368264	16.0	7.0	8.0	12020.0
690	36368264	4.0	9.0	10.0	14917.0
691	36368264	6.0	5.0	6.0	11607.0
692	36368264	20.0	5.0	10.0	13637.0
693	36368264	15.0	9.0	9.0	15374.0
694	36368264	19.0	9.0	6.0	16340.0
695	36368264	22.0	3.0	6.0	13494.0
696	36368264	14.0	6.0	3.0	10008.0
697	36368264	9.0	8.0	3.0	11911.0
698	36368264	21.0	8.0	9.0	15155.0
699	36368264	8.0	9.0	2.0	7787.0
700	24362750	12.0	11.0	5.0	14131.0
701	24362750	6.0	8.0	4.0	9305.0
702	24362750	12.0	4.0	7.0	12091.0
703	24362750	10.0	1.0	6.0	11440.0
704	24362750	5.0	7.0	3.0	10912.0
705	24362750	22.0	4.0	1.0	11020.0
706	24362750	8.0	6.0	4.0	10024.0
707	24362750	16.0	2.0	5.0	10958.0
708	24362750	10.0	5.0	2.0	9754.0
709	24362750	17.0	6.0	3.0	11382.0
710	24362750	9.0	3.0	4.0	11409.0
711	24362750	7.0	2.0	3.0	10327.0
712	24362750	9.0	5.0	2.0	13119.0
713	24362750	19.0	1.0	4.0	10992.0
714	24362750	2.0	2.0	3.0	5962.0
715	24362750	3.0	7.0	7.0	11488.0
716	24362750	9.0	3.0	4.0	14700.0
717	24362750	10.0	4.0	1.0	6788.0
718	24362750	9.0	6.0	0.0	9701.0
719	24362750	25.0	2.0	3.0	11059.0
720	24362750	16.0	3.0	0.0	13258.0
721	24362750	27.0	3.0	0.0	10258.0
722	24362750	8.0	2.0	1.0	6657.0
723	24362750	14.0	6.0	0.0	13914.0
724	24362750	18.0	8.0	3.0	14089.0
725	24362750	13.0	8.0	1.0	10590.0
726	24362750	11.0	6.0	6.0	11973.0
727	24362750	25.0	6.0	5.0	13002.0
728	24362750	20.0	2.0	2.0	9506.0
729	24362750	19.0	1.0	1.0	11559.0
730	24362750	10.0	5.0	6.0	17636.0
731	24362750	11.0	7.0	3.0	9665.0
732	24362750	4.0	4.0	1.0	5052.0
733	24362750	6.0	8.0	6.0	13607.0
734	24362750	27.0	4.0	9.0	19796.0
735	24362750	4.0	5.0	1.0	6157.0
736	24362750	19.0	5.0	5.0	14555.0
737	24362750	1.0	10.0	14.0	14393.0
738	24362750	9.0	6.0	4.0	9749.0
739	24362750	9.0	9.0	7.0	13017.0
740	24362750	19.0	5.0	2.0	10971.0
741	24362750	9.0	3.0	5.0	10955.0
742	24362750	2.0	3.0	2.0	8881.0
743	24362750	4.0	1.0	11.0	10395.0
744	24362750	18.0	2.0	5.0	10108.0
745	24362750	4.0	1.0	5.0	11498.0
746	24362750	2.0	5.0	0.0	5439.0
747	24362750	10.0	7.0	7.0	14246.0
748	24362750	39.0	7.0	6.0	13288.0
749	24362750	7.0	6.0	9.0	12876.0
750	24362750	22.0	3.0	5.0	8136.0
751	24362750	14.0	8.0	6.0	13872.0
752	24362750	18.0	4.0	4.0	9545.0
753	24362750	20.0	3.0	3.0	15413.0
754	24362750	10.0	5.0	7.0	13606.0
755	24362750	6.0	0.0	2.0	6576.0
756	24362750	23.0	6.0	3.0	12688.0
757	24362750	18.0	4.0	3.0	10692.0
758	24362750	6.0	9.0	8.0	12451.0
759	24362750	8.0	9.0	9.0	11177.0
760	24362750	6.0	10.0	4.0	12388.0
761	24362750	20.0	8.0	1.0	9672.0
762	24362750	9.0	7.0	3.0	8365.0
763	24362750	9.0	7.0	5.0	12459.0
764	24362750	24.0	2.0	1.0	9637.0
765	24362750	10.0	3.0	11.0	13348.0
766	24362750	24.0	5.0	2.0	8909.0
767	24362750	28.0	6.0	2.0	14331.0
768	24362750	15.0	6.0	8.0	11926.0
769	24362750	12.0	0.0	5.0	8210.0
770	24362750	17.0	3.0	3.0	10293.0
771	24362750	15.0	1.0	5.0	11571.0
772	24362750	20.0	6.0	3.0	11091.0
773	24362750	26.0	1.0	2.0	11286.0
774	24362750	26.0	4.0	0.0	11583.0
775	24362750	14.0	3.0	3.0	10863.0
776	24362750	5.0	15.0	5.0	12403.0
777	24362750	37.0	6.0	6.0	17902.0
778	24362750	9.0	4.0	2.0	11191.0
779	24362750	19.0	1.0	3.0	11437.0
780	24362750	22.0	3.0	3.0	12707.0
781	24362750	7.0	7.0	0.0	6505.0
782	24362750	8.0	7.0	3.0	8812.0
783	24362750	15.0	5.0	1.0	9843.0
784	24362750	8.0	6.0	1.0	8489.0
785	24362750	23.0	6.0	4.0	16945.0
786	24362750	5.0	11.0	3.0	10115.0
787	24362750	13.0	7.0	4.0	12881.0
788	24362750	8.0	7.0	10.0	17354.0
789	24362750	14.0	3.0	12.0	17393.0
790	24362750	19.0	7.0	15.0	19794.0
791	24362750	7.0	3.0	8.0	12817.0
792	24362750	7.0	3.0	13.0	15237.0
793	24362750	15.0	7.0	7.0	12423.0
794	24362750	27.0	4.0	9.0	13551.0
795	24362750	4.0	9.0	3.0	7348.0
796	24362750	10.0	5.0	12.0	11860.0
797	24362750	13.0	3.0	3.0	13714.0
798	24362750	17.0	8.0	3.0	12657.0
799	24362750	14.0	7.0	1.0	11225.0
800	34284659	11.0	3.0	2.0	5957.0
801	34284659	14.0	10.0	7.0	12748.0
802	34284659	7.0	8.0	12.0	12858.0
803	34284659	7.0	5.0	2.0	9554.0
804	34284659	3.0	2.0	3.0	11421.0
805	34284659	9.0	2.0	3.0	9049.0
806	34284659	19.0	3.0	2.0	13438.0
807	34284659	6.0	4.0	5.0	11346.0
808	34284659	3.0	8.0	3.0	8041.0
809	34284659	11.0	11.0	5.0	11601.0
810	34284659	6.0	6.0	16.0	16321.0
811	34284659	11.0	9.0	7.0	19682.0
812	34284659	5.0	2.0	10.0	11076.0
813	34284659	7.0	2.0	9.0	13111.0
814	34284659	10.0	2.0	5.0	9974.0
815	34284659	4.0	1.0	5.0	9670.0
816	34284659	8.0	3.0	14.0	16985.0
817	34284659	11.0	6.0	0.0	10574.0
818	34284659	11.0	6.0	0.0	9709.0
819	34284659	16.0	0.0	9.0	11739.0
820	34284659	8.0	6.0	10.0	13863.0
821	34284659	4.0	7.0	7.0	9262.0
822	34284659	15.0	6.0	10.0	16937.0
823	34284659	5.0	8.0	3.0	8399.0
824	34284659	18.0	11.0	5.0	13937.0
825	34284659	13.0	10.0	10.0	16207.0
826	34284659	4.0	3.0	4.0	10421.0
827	34284659	5.0	5.0	1.0	9749.0
828	34284659	7.0	1.0	0.0	9657.0
829	34284659	20.0	6.0	4.0	16673.0
830	34284659	18.0	5.0	4.0	17164.0
831	34284659	9.0	10.0	6.0	9562.0
832	34284659	4.0	2.0	8.0	11587.0
833	34284659	13.0	6.0	5.0	11825.0
834	34284659	4.0	1.0	1.0	9399.0
835	34284659	10.0	3.0	6.0	11916.0
836	34284659	11.0	2.0	5.0	8554.0
837	34284659	12.0	5.0	15.0	14906.0
838	34284659	3.0	2.0	8.0	9802.0
839	34284659	11.0	10.0	3.0	14090.0
840	34284659	4.0	5.0	8.0	8283.0
841	34284659	4.0	6.0	2.0	8057.0
842	34284659	7.0	7.0	9.0	11024.0
843	34284659	18.0	7.0	15.0	20614.0
844	34284659	7.0	2.0	4.0	9604.0
845	34284659	7.0	3.0	9.0	10983.0
846	34284659	11.0	1.0	5.0	11325.0
847	34284659	12.0	3.0	1.0	11060.0
848	34284659	15.0	3.0	1.0	8860.0
849	34284659	17.0	2.0	3.0	9902.0
850	34284659	28.0	0.0	4.0	13492.0
851	34284659	7.0	4.0	3.0	9034.0
852	34284659	13.0	2.0	12.0	15595.0
853	34284659	13.0	2.0	4.0	7193.0
854	34284659	12.0	4.0	6.0	11595.0
855	34284659	10.0	9.0	6.0	15083.0
856	34284659	15.0	5.0	4.0	11852.0
857	34284659	12.0	0.0	1.0	7413.0
858	34284659	6.0	8.0	0.0	7531.0
859	34284659	7.0	9.0	2.0	8946.0
860	34284659	13.0	5.0	3.0	14183.0
861	34284659	1.0	4.0	0.0	6287.0
862	34284659	5.0	2.0	3.0	9406.0
863	34284659	8.0	2.0	9.0	11644.0
864	34284659	7.0	5.0	6.0	12802.0
865	34284659	19.0	7.0	2.0	13576.0
866	34284659	17.0	5.0	6.0	13028.0
867	34284659	11.0	6.0	3.0	12981.0
868	34284659	31.0	9.0	7.0	18985.0
869	34284659	1.0	6.0	3.0	8504.0
870	34284659	15.0	5.0	6.0	12470.0
871	34284659	8.0	7.0	4.0	9021.0
872	34284659	15.0	6.0	2.0	8798.0
873	34284659	4.0	6.0	1.0	8925.0
874	34284659	13.0	4.0	7.0	13569.0
875	34284659	7.0	2.0	3.0	12554.0
876	34284659	11.0	3.0	2.0	8073.0
877	34284659	18.0	6.0	0.0	9687.0
878	34284659	7.0	4.0	3.0	12281.0
879	34284659	24.0	5.0	4.0	12931.0
880	34284659	9.0	0.0	6.0	13049.0
881	34284659	10.0	10.0	13.0	22869.0
882	34284659	15.0	2.0	3.0	14256.0
883	34284659	13.0	3.0	9.0	17762.0
884	34284659	23.0	11.0	1.0	18973.0
885	34284659	16.0	0.0	1.0	8693.0
886	34284659	9.0	11.0	1.0	12091.0
887	34284659	9.0	7.0	7.0	12355.0
888	34284659	5.0	5.0	1.0	8013.0
889	34284659	9.0	3.0	3.0	8726.0
890	34284659	15.0	8.0	6.0	11361.0
891	34284659	12.0	2.0	4.0	11838.0
892	34284659	9.0	5.0	10.0	15519.0
893	34284659	9.0	10.0	0.0	8392.0
894	34284659	6.0	7.0	3.0	9070.0
895	34284659	11.0	5.0	10.0	14469.0
896	34284659	14.0	10.0	6.0	16251.0
897	34284659	7.0	7.0	1.0	7659.0
898	34284659	9.0	3.0	11.0	12849.0
899	34284659	11.0	11.0	6.0	15085.0
900	48424446	6.0	11.0	22.0	17939.0
901	48424446	0.0	5.0	1.0	5951.0
902	48424446	15.0	4.0	10.0	14183.0
903	48424446	11.0	8.0	9.0	13626.0
904	48424446	12.0	5.0	6.0	15562.0
905	48424446	7.0	7.0	5.0	10805.0
906	48424446	6.0	3.0	10.0	13083.0
907	48424446	22.0	5.0	8.0	19093.0
908	48424446	4.0	5.0	2.0	10058.0
909	48424446	15.0	9.0	8.0	16603.0
910	48424446	10.0	4.0	4.0	13516.0
911	48424446	6.0	4.0	2.0	12845.0
912	48424446	5.0	9.0	6.0	8698.0
913	48424446	4.0	5.0	7.0	17084.0
914	48424446	3.0	2.0	1.0	7689.0
915	48424446	5.0	3.0	2.0	8609.0
916	48424446	4.0	8.0	3.0	12959.0
917	48424446	11.0	6.0	12.0	16064.0
918	48424446	11.0	9.0	8.0	14235.0
919	48424446	1.0	6.0	3.0	7415.0
920	48424446	21.0	6.0	1.0	11565.0
921	48424446	11.0	5.0	1.0	9279.0
922	48424446	10.0	1.0	8.0	9997.0
923	48424446	12.0	2.0	7.0	12711.0
924	48424446	19.0	8.0	19.0	21463.0
925	48424446	8.0	12.0	6.0	11570.0
926	48424446	6.0	3.0	4.0	11025.0
927	48424446	4.0	1.0	1.0	8005.0
928	48424446	21.0	6.0	0.0	12218.0
929	48424446	2.0	7.0	7.0	8186.0
930	48424446	9.0	6.0	6.0	15299.0
931	48424446	10.0	4.0	10.0	16868.0
932	48424446	1.0	7.0	1.0	6977.0
933	48424446	24.0	8.0	9.0	16291.0
934	48424446	7.0	3.0	8.0	12022.0
935	48424446	14.0	5.0	2.0	8407.0
936	48424446	7.0	6.0	1.0	12530.0
937	48424446	12.0	6.0	6.0	15702.0
938	48424446	6.0	3.0	4.0	12047.0
939	48424446	14.0	9.0	3.0	14858.0
940	48424446	7.0	2.0	9.0	13350.0
941	48424446	6.0	9.0	7.0	11616.0
942	48424446	11.0	2.0	9.0	13520.0
943	48424446	19.0	5.0	15.0	19522.0
944	48424446	11.0	3.0	16.0	13352.0
945	48424446	3.0	2.0	9.0	10109.0
946	48424446	4.0	12.0	4.0	9875.0
947	48424446	6.0	2.0	10.0	12039.0
948	48424446	9.0	7.0	2.0	10605.0
949	48424446	8.0	2.0	10.0	11736.0
950	48424446	15.0	7.0	4.0	11334.0
951	48424446	5.0	9.0	2.0	6229.0
952	48424446	10.0	7.0	2.0	12160.0
953	48424446	3.0	8.0	5.0	14684.0
954	48424446	0.0	6.0	0.0	4361.0
955	48424446	8.0	3.0	9.0	8864.0
956	48424446	1.0	8.0	2.0	8296.0
957	48424446	16.0	7.0	1.0	12344.0
958	48424446	1.0	4.0	3.0	6380.0
959	48424446	3.0	10.0	7.0	12082.0
960	48424446	5.0	8.0	3.0	9573.0
961	48424446	4.0	5.0	6.0	11624.0
962	48424446	5.0	7.0	3.0	10313.0
963	48424446	9.0	6.0	6.0	11948.0
964	48424446	2.0	6.0	3.0	9329.0
965	48424446	15.0	0.0	13.0	13902.0
966	48424446	15.0	9.0	8.0	13460.0
967	48424446	7.0	6.0	8.0	11190.0
968	48424446	11.0	7.0	4.0	11141.0
969	48424446	3.0	5.0	0.0	9521.0
970	48424446	8.0	6.0	3.0	11693.0
971	48424446	6.0	5.0	5.0	8136.0
972	48424446	0.0	7.0	2.0	9599.0
973	48424446	25.0	3.0	8.0	16051.0
974	48424446	5.0	4.0	5.0	10737.0
975	48424446	11.0	3.0	11.0	20848.0
976	48424446	10.0	6.0	13.0	14697.0
977	48424446	8.0	9.0	4.0	10090.0
978	48424446	16.0	7.0	3.0	15776.0
979	48424446	4.0	2.0	6.0	10429.0
980	48424446	7.0	8.0	2.0	11525.0
981	48424446	11.0	5.0	5.0	12214.0
982	48424446	13.0	5.0	5.0	13727.0
983	48424446	1.0	2.0	4.0	6965.0
984	48424446	7.0	7.0	12.0	16536.0
985	48424446	3.0	5.0	4.0	9792.0
986	48424446	6.0	9.0	3.0	6068.0
987	48424446	10.0	9.0	2.0	9854.0
988	48424446	2.0	4.0	8.0	9001.0
989	48424446	2.0	7.0	0.0	9352.0
990	48424446	17.0	11.0	4.0	15749.0
991	48424446	9.0	3.0	6.0	8909.0
992	48424446	6.0	9.0	6.0	15775.0
993	48424446	14.0	8.0	10.0	16779.0
994	48424446	7.0	3.0	3.0	10550.0
995	48424446	7.0	10.0	4.0	11406.0
996	48424446	11.0	7.0	16.0	14131.0
997	48424446	7.0	8.0	9.0	14550.0
998	48424446	13.0	8.0	15.0	18913.0
999	48424446	23.0	5.0	4.0	12887.0
1000	52442474	9.0	5.0	1.0	12393.0
1001	52442474	9.0	9.0	16.0	16783.0
1002	52442474	0.0	4.0	3.0	6849.0
1003	52442474	0.0	4.0	0.0	5647.0
1004	52442474	11.0	5.0	12.0	19182.0
1005	52442474	4.0	5.0	4.0	8050.0
1006	52442474	13.0	1.0	20.0	16044.0
1007	52442474	1.0	4.0	13.0	15667.0
1008	52442474	3.0	5.0	11.0	14962.0
1009	52442474	16.0	8.0	5.0	13504.0
1010	52442474	4.0	9.0	6.0	10958.0
1011	52442474	9.0	3.0	15.0	15559.0
1012	52442474	6.0	3.0	5.0	11297.0
1013	52442474	11.0	2.0	0.0	6144.0
1014	52442474	2.0	1.0	1.0	8610.0
1015	52442474	8.0	3.0	14.0	17461.0
1016	52442474	3.0	3.0	19.0	11146.0
1017	52442474	7.0	4.0	5.0	12913.0
1018	52442474	7.0	3.0	11.0	15297.0
1019	52442474	10.0	7.0	9.0	16469.0
1020	52442474	2.0	1.0	8.0	7700.0
1021	52442474	6.0	4.0	2.0	9926.0
1022	52442474	4.0	2.0	7.0	10551.0
1023	52442474	3.0	2.0	16.0	12918.0
1024	52442474	10.0	6.0	21.0	21536.0
1025	52442474	0.0	4.0	0.0	9540.0
1026	52442474	7.0	3.0	9.0	16425.0
1027	52442474	13.0	3.0	10.0	18016.0
1028	52442474	1.0	2.0	3.0	11821.0
1029	52442474	10.0	3.0	8.0	14992.0
1030	52442474	4.0	1.0	14.0	12914.0
1031	52442474	2.0	1.0	0.0	8265.0
1032	52442474	1.0	4.0	0.0	5651.0
1033	52442474	13.0	6.0	11.0	16140.0
1034	52442474	3.0	9.0	5.0	10407.0
1035	52442474	7.0	4.0	14.0	14982.0
1036	52442474	7.0	5.0	6.0	14908.0
1037	52442474	6.0	3.0	12.0	14907.0
1038	52442474	1.0	0.0	10.0	12121.0
1039	52442474	11.0	4.0	13.0	16970.0
1040	52442474	3.0	9.0	4.0	14447.0
1041	52442474	10.0	7.0	3.0	24129.0
1042	52442474	5.0	2.0	1.0	9942.0
1043	52442474	31.0	5.0	3.0	13732.0
1044	52442474	0.0	2.0	1.0	7879.0
1045	52442474	6.0	5.0	5.0	13306.0
1046	52442474	1.0	5.0	0.0	6274.0
1047	52442474	9.0	8.0	6.0	17649.0
1048	52442474	5.0	0.0	2.0	10477.0
1049	52442474	14.0	9.0	9.0	17249.0
1050	52442474	0.0	8.0	3.0	14934.0
1051	52442474	11.0	7.0	11.0	16974.0
1052	52442474	5.0	1.0	7.0	15036.0
1053	52442474	2.0	0.0	5.0	8204.0
1054	52442474	1.0	7.0	0.0	6665.0
1055	52442474	2.0	2.0	1.0	7517.0
1056	52442474	1.0	3.0	1.0	7604.0
1057	52442474	8.0	4.0	7.0	15809.0
1058	52442474	7.0	4.0	8.0	12440.0
1059	52442474	4.0	2.0	5.0	11102.0
1060	52442474	8.0	2.0	13.0	15621.0
1061	52442474	3.0	2.0	9.0	13039.0
1062	52442474	11.0	5.0	8.0	16981.0
1063	52442474	3.0	2.0	5.0	16591.0
1064	52442474	6.0	2.0	7.0	14349.0
1065	52442474	4.0	4.0	8.0	13291.0
1066	52442474	15.0	9.0	10.0	17876.0
1067	52442474	8.0	8.0	2.0	13226.0
1068	52442474	5.0	2.0	5.0	9555.0
1069	52442474	3.0	4.0	11.0	15091.0
1070	52442474	14.0	4.0	14.0	16517.0
1071	52442474	6.0	7.0	5.0	16896.0
1072	52442474	8.0	1.0	4.0	11328.0
1073	52442474	4.0	3.0	0.0	5968.0
1074	52442474	9.0	5.0	8.0	12711.0
1075	52442474	10.0	5.0	14.0	19316.0
1076	52442474	4.0	0.0	7.0	13907.0
1077	52442474	0.0	2.0	8.0	8326.0
1078	52442474	5.0	4.0	4.0	12486.0
1079	52442474	12.0	7.0	9.0	21143.0
1080	52442474	10.0	3.0	4.0	11087.0
1081	52442474	3.0	5.0	1.0	10691.0
1082	52442474	1.0	2.0	0.0	4833.0
1083	52442474	6.0	3.0	15.0	17406.0
1084	52442474	13.0	6.0	14.0	14564.0
1085	52442474	3.0	1.0	10.0	13277.0
1086	52442474	9.0	4.0	10.0	14873.0
1087	52442474	5.0	2.0	25.0	20356.0
1088	52442474	7.0	5.0	9.0	13704.0
1089	52442474	8.0	4.0	7.0	14545.0
1090	52442474	2.0	9.0	3.0	10480.0
1091	52442474	5.0	6.0	3.0	10049.0
1092	52442474	9.0	7.0	3.0	12849.0
1093	52442474	4.0	7.0	3.0	12118.0
1094	52442474	11.0	2.0	8.0	13711.0
1095	52442474	3.0	2.0	5.0	14241.0
1096	52442474	4.0	6.0	2.0	10747.0
1097	52442474	5.0	2.0	9.0	12953.0
1098	52442474	7.0	3.0	13.0	17867.0
1099	52442474	11.0	7.0	11.0	18589.0
1100	58649062	13.0	4.0	0.0	8117.0
1101	58649062	12.0	1.0	4.0	7199.0
1102	58649062	14.0	4.0	4.0	7381.0
1103	58649062	5.0	2.0	8.0	15573.0
1104	58649062	7.0	4.0	13.0	15335.0
1105	58649062	5.0	0.0	5.0	8621.0
1106	58649062	1.0	5.0	4.0	10226.0
1107	58649062	0.0	6.0	0.0	3198.0
1108	58649062	8.0	2.0	4.0	9946.0
1109	58649062	6.0	6.0	12.0	14214.0
1110	58649062	15.0	2.0	17.0	19253.0
1111	58649062	32.0	9.0	12.0	18295.0
1112	58649062	2.0	3.0	7.0	9094.0
1113	58649062	21.0	4.0	1.0	8650.0
1114	58649062	10.0	6.0	5.0	12681.0
1115	58649062	4.0	3.0	2.0	8325.0
1116	58649062	4.0	1.0	2.0	7002.0
1117	58649062	6.0	0.0	6.0	11632.0
1118	58649062	16.0	5.0	0.0	8542.0
1119	58649062	10.0	6.0	3.0	9868.0
1120	58649062	5.0	5.0	1.0	5184.0
1121	58649062	14.0	7.0	3.0	14263.0
1122	58649062	4.0	6.0	2.0	8518.0
1123	58649062	15.0	8.0	1.0	13636.0
1124	58649062	7.0	6.0	8.0	14332.0
1125	58649062	4.0	4.0	2.0	6203.0
1126	58649062	6.0	1.0	14.0	13488.0
1127	58649062	12.0	4.0	6.0	11147.0
1128	58649062	7.0	3.0	10.0	12363.0
1129	58649062	12.0	0.0	7.0	9844.0
1130	58649062	6.0	3.0	6.0	9190.0
1131	58649062	6.0	1.0	11.0	13266.0
1132	58649062	3.0	5.0	6.0	8503.0
1133	58649062	19.0	7.0	6.0	13496.0
1134	58649062	19.0	9.0	9.0	15017.0
1135	58649062	19.0	5.0	8.0	13719.0
1136	58649062	5.0	8.0	1.0	7930.0
1137	58649062	10.0	5.0	4.0	10381.0
1138	58649062	3.0	9.0	3.0	8323.0
1139	58649062	21.0	13.0	11.0	17107.0
1140	58649062	9.0	3.0	2.0	6768.0
1141	58649062	3.0	8.0	4.0	11381.0
1142	58649062	3.0	1.0	2.0	11011.0
1143	58649062	18.0	9.0	10.0	15874.0
1144	58649062	19.0	7.0	8.0	13034.0
1145	58649062	11.0	3.0	3.0	11505.0
1146	58649062	3.0	4.0	8.0	12177.0
1147	58649062	2.0	7.0	1.0	6483.0
1148	58649062	7.0	4.0	2.0	6418.0
1149	58649062	10.0	5.0	14.0	14122.0
1150	58649062	26.0	7.0	7.0	18137.0
1151	58649062	11.0	10.0	14.0	21348.0
1152	58649062	3.0	4.0	6.0	10312.0
1153	58649062	12.0	1.0	12.0	15727.0
1154	58649062	9.0	2.0	10.0	17002.0
1155	58649062	7.0	6.0	6.0	13428.0
1156	58649062	27.0	4.0	6.0	16597.0
1157	58649062	8.0	6.0	0.0	6593.0
1158	58649062	4.0	1.0	6.0	9012.0
1159	58649062	6.0	1.0	9.0	12939.0
1160	58649062	7.0	1.0	6.0	10185.0
1161	58649062	26.0	6.0	5.0	15054.0
1162	58649062	5.0	9.0	15.0	16229.0
1163	58649062	6.0	2.0	6.0	9088.0
1164	58649062	6.0	2.0	7.0	11575.0
1165	58649062	9.0	11.0	10.0	18659.0
1166	58649062	9.0	3.0	4.0	10782.0
1167	58649062	3.0	8.0	3.0	8754.0
1168	58649062	7.0	5.0	6.0	10994.0
1169	58649062	11.0	0.0	12.0	9984.0
1170	58649062	1.0	4.0	2.0	6092.0
1171	58649062	13.0	8.0	7.0	11512.0
1172	58649062	2.0	5.0	1.0	7426.0
1173	58649062	2.0	4.0	2.0	8822.0
1174	58649062	1.0	2.0	3.0	4962.0
1175	58649062	12.0	3.0	6.0	11222.0
1176	58649062	8.0	5.0	13.0	13193.0
1177	58649062	8.0	1.0	8.0	9553.0
1178	58649062	19.0	8.0	17.0	21605.0
1179	58649062	5.0	5.0	3.0	9194.0
1180	58649062	4.0	2.0	11.0	10414.0
1181	58649062	5.0	6.0	21.0	14591.0
1182	58649062	15.0	6.0	6.0	16917.0
1183	58649062	6.0	4.0	5.0	10828.0
1184	58649062	11.0	3.0	10.0	15907.0
1185	58649062	18.0	9.0	3.0	15506.0
1186	58649062	5.0	8.0	1.0	8901.0
1187	58649062	7.0	4.0	7.0	11453.0
1188	58649062	11.0	11.0	9.0	13908.0
1189	58649062	2.0	5.0	1.0	5500.0
1190	58649062	14.0	9.0	5.0	19521.0
1191	58649062	16.0	3.0	9.0	16476.0
1192	58649062	2.0	3.0	2.0	7183.0
1193	58649062	8.0	1.0	1.0	9827.0
1194	58649062	10.0	2.0	10.0	13399.0
1195	58649062	7.0	5.0	4.0	8191.0
1196	58649062	22.0	7.0	2.0	15151.0
1197	58649062	4.0	7.0	3.0	11923.0
1198	58649062	3.0	12.0	6.0	8942.0
1199	58649062	4.0	9.0	3.0	8943.0
1200	45603239	6.0	1.0	4.0	10120.0
1201	45603239	7.0	8.0	4.0	11597.0
1202	45603239	9.0	8.0	6.0	11475.0
1203	45603239	17.0	3.0	5.0	10378.0
1204	45603239	7.0	0.0	6.0	7161.0
1205	45603239	30.0	8.0	6.0	15003.0
1206	45603239	6.0	2.0	3.0	7624.0
1207	45603239	0.0	6.0	0.0	4473.0
1208	45603239	16.0	2.0	5.0	8357.0
1209	45603239	9.0	8.0	1.0	7054.0
1210	45603239	8.0	3.0	3.0	6377.0
1211	45603239	17.0	7.0	4.0	12258.0
1212	45603239	19.0	9.0	7.0	13546.0
1213	45603239	15.0	0.0	7.0	13660.0
1214	45603239	4.0	2.0	3.0	6037.0
1215	45603239	12.0	6.0	9.0	11016.0
1216	45603239	3.0	5.0	1.0	10665.0
1217	45603239	10.0	0.0	6.0	14729.0
1218	45603239	10.0	8.0	9.0	12434.0
1219	45603239	13.0	3.0	6.0	13189.0
1220	45603239	6.0	10.0	2.0	6552.0
1221	45603239	2.0	3.0	4.0	8387.0
1222	45603239	2.0	4.0	1.0	6183.0
1223	45603239	13.0	5.0	2.0	12229.0
1224	45603239	14.0	3.0	2.0	8620.0
1225	45603239	2.0	8.0	2.0	7719.0
1226	45603239	15.0	8.0	6.0	16301.0
1227	45603239	5.0	6.0	6.0	11089.0
1228	45603239	22.0	4.0	8.0	15724.0
1229	45603239	11.0	6.0	1.0	9962.0
1230	45603239	25.0	2.0	4.0	14131.0
1231	45603239	2.0	5.0	1.0	4845.0
1232	45603239	1.0	6.0	2.0	5291.0
1233	45603239	7.0	6.0	2.0	10976.0
1234	45603239	13.0	3.0	12.0	14339.0
1235	45603239	6.0	0.0	13.0	11304.0
1236	45603239	8.0	2.0	16.0	16415.0
1237	45603239	13.0	2.0	14.0	16720.0
1238	45603239	6.0	3.0	19.0	15643.0
1239	45603239	9.0	3.0	12.0	11603.0
1240	45603239	5.0	7.0	1.0	7018.0
1241	45603239	17.0	2.0	11.0	16995.0
1242	45603239	9.0	1.0	16.0	13525.0
1243	45603239	14.0	8.0	13.0	17054.0
1244	45603239	9.0	4.0	9.0	15927.0
1245	45603239	5.0	4.0	7.0	10995.0
1246	45603239	3.0	9.0	12.0	15566.0
1247	45603239	5.0	8.0	8.0	14341.0
1248	45603239	3.0	0.0	7.0	8263.0
1249	45603239	3.0	1.0	11.0	9672.0
1250	45603239	10.0	3.0	10.0	10990.0
1251	45603239	7.0	5.0	9.0	13362.0
1252	45603239	11.0	1.0	9.0	11734.0
1253	45603239	4.0	1.0	1.0	6559.0
1254	45603239	6.0	2.0	16.0	16188.0
1255	45603239	11.0	3.0	5.0	11671.0
1256	45603239	2.0	3.0	1.0	7594.0
1257	45603239	18.0	5.0	8.0	14928.0
1258	45603239	4.0	4.0	9.0	10796.0
1259	45603239	0.0	4.0	0.0	4867.0
1260	45603239	14.0	9.0	9.0	17662.0
1261	45603239	16.0	3.0	10.0	13567.0
1262	45603239	2.0	5.0	11.0	12780.0
1263	45603239	10.0	2.0	14.0	14843.0
1264	45603239	5.0	1.0	6.0	8788.0
1265	45603239	0.0	4.0	3.0	6509.0
1266	45603239	4.0	6.0	2.0	10758.0
1267	45603239	3.0	7.0	11.0	13725.0
1268	45603239	8.0	6.0	18.0	17263.0
1269	45603239	0.0	3.0	0.0	5191.0
1270	45603239	7.0	6.0	13.0	15232.0
1271	45603239	7.0	9.0	3.0	10882.0
1272	45603239	12.0	10.0	3.0	18216.0
1273	45603239	8.0	0.0	5.0	8719.0
1274	45603239	7.0	3.0	16.0	14444.0
1275	45603239	6.0	1.0	2.0	7910.0
1276	45603239	12.0	5.0	11.0	13250.0
1277	45603239	15.0	5.0	7.0	14132.0
1278	45603239	4.0	3.0	3.0	10158.0
1279	45603239	12.0	4.0	11.0	13887.0
1280	45603239	15.0	4.0	7.0	14011.0
1281	45603239	2.0	8.0	0.0	5530.0
1282	45603239	5.0	2.0	4.0	7515.0
1283	45603239	3.0	6.0	4.0	6223.0
1284	45603239	13.0	2.0	6.0	12478.0
1285	45603239	9.0	7.0	4.0	14159.0
1286	45603239	10.0	8.0	8.0	13964.0
1287	45603239	9.0	3.0	11.0	15024.0
1288	45603239	10.0	5.0	10.0	16886.0
1289	45603239	1.0	2.0	1.0	7468.0
1290	45603239	6.0	2.0	9.0	16291.0
1291	45603239	1.0	3.0	2.0	7914.0
1292	45603239	2.0	1.0	4.0	7533.0
1293	45603239	6.0	6.0	5.0	11679.0
1294	45603239	4.0	5.0	6.0	9501.0
1295	45603239	7.0	4.0	4.0	10288.0
1296	45603239	9.0	3.0	11.0	11474.0
1297	45603239	5.0	8.0	5.0	8867.0
1298	45603239	0.0	5.0	0.0	4727.0
1299	45603239	2.0	2.0	1.0	7101.0
1300	69571362	4.0	6.0	6.0	9866.0
1301	69571362	2.0	1.0	2.0	6694.0
1302	69571362	12.0	7.0	3.0	10518.0
1303	69571362	30.0	9.0	5.0	14133.0
1304	69571362	6.0	3.0	9.0	8461.0
1305	69571362	3.0	2.0	3.0	7203.0
1306	69571362	8.0	7.0	1.0	9677.0
1307	69571362	3.0	2.0	3.0	10215.0
1308	69571362	11.0	5.0	2.0	12893.0
1309	69571362	5.0	6.0	1.0	8848.0
1310	69571362	12.0	2.0	8.0	11110.0
1311	69571362	7.0	2.0	0.0	6488.0
1312	69571362	1.0	3.0	1.0	5853.0
1313	69571362	8.0	0.0	4.0	8496.0
1314	69571362	7.0	8.0	2.0	9721.0
1315	69571362	22.0	1.0	8.0	17053.0
1316	69571362	5.0	7.0	5.0	12515.0
1317	69571362	8.0	3.0	12.0	14332.0
1318	69571362	15.0	3.0	3.0	10064.0
1319	69571362	12.0	4.0	12.0	13407.0
1320	69571362	16.0	7.0	1.0	10753.0
1321	69571362	24.0	4.0	2.0	12080.0
1322	69571362	15.0	9.0	1.0	8866.0
1323	69571362	16.0	9.0	2.0	9956.0
1324	69571362	4.0	1.0	0.0	5080.0
1325	69571362	2.0	3.0	3.0	8225.0
1326	69571362	8.0	5.0	9.0	13074.0
1327	69571362	11.0	1.0	2.0	7838.0
1328	69571362	9.0	0.0	9.0	12090.0
1329	69571362	4.0	4.0	8.0	12801.0
1330	69571362	19.0	1.0	2.0	7957.0
1331	69571362	14.0	1.0	4.0	7751.0
1332	69571362	6.0	4.0	0.0	5627.0
1333	69571362	5.0	2.0	0.0	5061.0
1334	69571362	17.0	11.0	8.0	15006.0
1335	69571362	3.0	1.0	8.0	7886.0
1336	69571362	10.0	2.0	4.0	11163.0
1337	69571362	20.0	1.0	1.0	9471.0
1338	69571362	13.0	0.0	2.0	7168.0
1339	69571362	8.0	6.0	0.0	7666.0
1340	69571362	12.0	0.0	0.0	6146.0
1341	69571362	5.0	2.0	0.0	4606.0
1342	69571362	21.0	1.0	0.0	9604.0
1343	69571362	16.0	4.0	1.0	9095.0
1344	69571362	5.0	6.0	0.0	4926.0
1345	69571362	5.0	6.0	10.0	17917.0
1346	69571362	10.0	2.0	2.0	9289.0
1347	69571362	7.0	7.0	0.0	7623.0
1348	69571362	1.0	1.0	1.0	6086.0
1349	69571362	4.0	5.0	8.0	14603.0
1350	69571362	10.0	2.0	9.0	13529.0
1351	69571362	3.0	6.0	5.0	10878.0
1352	69571362	0.0	3.0	1.0	6165.0
1353	69571362	9.0	8.0	11.0	12540.0
1354	69571362	7.0	4.0	8.0	13038.0
1355	69571362	11.0	1.0	1.0	10520.0
1356	69571362	17.0	8.0	17.0	16750.0
1357	69571362	12.0	3.0	1.0	6524.0
1358	69571362	8.0	7.0	8.0	14030.0
1359	69571362	15.0	3.0	6.0	9203.0
1360	69571362	13.0	5.0	2.0	9656.0
1361	69571362	7.0	4.0	4.0	10112.0
1362	69571362	2.0	6.0	3.0	6475.0
1363	69571362	7.0	2.0	7.0	10166.0
1364	69571362	12.0	3.0	0.0	8868.0
1365	69571362	8.0	4.0	0.0	5637.0
1366	69571362	13.0	2.0	4.0	10264.0
1367	69571362	16.0	6.0	2.0	9901.0
1368	69571362	17.0	4.0	6.0	12905.0
1369	69571362	1.0	2.0	2.0	5949.0
1370	69571362	6.0	1.0	5.0	8335.0
1371	69571362	13.0	3.0	9.0	14586.0
1372	69571362	8.0	6.0	8.0	14284.0
1373	69571362	8.0	1.0	3.0	12168.0
1374	69571362	10.0	6.0	9.0	21314.0
1375	69571362	0.0	2.0	2.0	6713.0
1376	69571362	8.0	5.0	4.0	12299.0
1377	69571362	11.0	3.0	7.0	9842.0
1378	69571362	13.0	5.0	6.0	14085.0
1379	69571362	23.0	2.0	1.0	10457.0
1380	69571362	5.0	5.0	5.0	10221.0
1381	69571362	16.0	8.0	9.0	15851.0
1382	69571362	7.0	2.0	9.0	13024.0
1383	69571362	19.0	3.0	1.0	11706.0
1384	69571362	5.0	9.0	9.0	11322.0
1385	69571362	20.0	3.0	3.0	14698.0
1386	69571362	9.0	6.0	2.0	9411.0
1387	69571362	12.0	6.0	13.0	16804.0
1388	69571362	11.0	4.0	2.0	13950.0
1389	69571362	0.0	3.0	4.0	7968.0
1390	69571362	5.0	2.0	9.0	11083.0
1391	69571362	7.0	0.0	4.0	9042.0
1392	69571362	11.0	6.0	14.0	17010.0
1393	69571362	12.0	8.0	10.0	13833.0
1394	69571362	6.0	5.0	12.0	15049.0
1395	69571362	1.0	4.0	5.0	10652.0
1396	69571362	13.0	6.0	3.0	13733.0
1397	69571362	6.0	4.0	4.0	11100.0
1398	69571362	7.0	2.0	8.0	8972.0
1399	69571362	14.0	10.0	6.0	13118.0
1400	19441797	12.0	11.0	1.0	10357.0
1401	19441797	7.0	10.0	11.0	15094.0
1402	19441797	5.0	1.0	7.0	15150.0
1403	19441797	13.0	10.0	0.0	9710.0
1404	19441797	18.0	8.0	5.0	17157.0
1405	19441797	8.0	4.0	3.0	13742.0
1406	19441797	8.0	8.0	2.0	14499.0
1407	19441797	9.0	3.0	5.0	10309.0
1408	19441797	19.0	5.0	4.0	13871.0
1409	19441797	12.0	5.0	7.0	12431.0
1410	19441797	14.0	8.0	2.0	8615.0
1411	19441797	13.0	4.0	13.0	13736.0
1412	19441797	28.0	6.0	9.0	18124.0
1413	19441797	15.0	4.0	10.0	12599.0
1414	19441797	29.0	10.0	0.0	9870.0
1415	19441797	25.0	7.0	6.0	16729.0
1416	19441797	9.0	5.0	1.0	5619.0
1417	19441797	27.0	6.0	0.0	11212.0
1418	19441797	11.0	7.0	4.0	8951.0
1419	19441797	8.0	10.0	0.0	8707.0
1420	19441797	8.0	9.0	2.0	8288.0
1421	19441797	21.0	5.0	7.0	14498.0
1422	19441797	23.0	11.0	6.0	16253.0
1423	19441797	22.0	5.0	6.0	15395.0
1424	19441797	22.0	13.0	1.0	11406.0
1425	19441797	26.0	6.0	4.0	11870.0
1426	19441797	14.0	3.0	12.0	12151.0
1427	19441797	15.0	5.0	7.0	16447.0
1428	19441797	15.0	13.0	5.0	11511.0
1429	19441797	7.0	0.0	9.0	11305.0
1430	19441797	33.0	6.0	6.0	19437.0
1431	19441797	7.0	12.0	5.0	13333.0
1432	19441797	9.0	8.0	2.0	6989.0
1433	19441797	23.0	8.0	4.0	14443.0
1434	19441797	10.0	7.0	0.0	8613.0
1435	19441797	14.0	5.0	1.0	10675.0
1436	19441797	13.0	14.0	2.0	9649.0
1437	19441797	20.0	5.0	1.0	11239.0
1438	19441797	4.0	5.0	7.0	14258.0
1439	19441797	14.0	2.0	5.0	13115.0
1440	19441797	29.0	3.0	3.0	12545.0
1441	19441797	9.0	1.0	0.0	5440.0
1442	19441797	16.0	5.0	7.0	14414.0
1443	19441797	2.0	4.0	2.0	6019.0
1444	19441797	16.0	10.0	1.0	11300.0
1445	19441797	22.0	2.0	3.0	9703.0
1446	19441797	18.0	8.0	1.0	9480.0
1447	19441797	11.0	9.0	1.0	6366.0
1448	19441797	28.0	7.0	1.0	12221.0
1449	19441797	17.0	3.0	2.0	8919.0
1450	19441797	12.0	10.0	3.0	8692.0
1451	19441797	19.0	6.0	1.0	11450.0
1452	19441797	28.0	3.0	0.0	11488.0
1453	19441797	13.0	6.0	1.0	7679.0
1454	19441797	11.0	7.0	0.0	9494.0
1455	19441797	18.0	2.0	0.0	6200.0
1456	19441797	3.0	4.0	2.0	4668.0
1457	19441797	1.0	6.0	4.0	8015.0
1458	19441797	24.0	7.0	2.0	9317.0
1459	19441797	22.0	6.0	2.0	9284.0
1460	19441797	34.0	9.0	3.0	13605.0
1461	19441797	5.0	13.0	0.0	6585.0
1462	19441797	6.0	1.0	5.0	8979.0
1463	19441797	6.0	8.0	2.0	8373.0
1464	19441797	13.0	6.0	1.0	7995.0
1465	19441797	14.0	7.0	1.0	7966.0
1466	19441797	10.0	0.0	1.0	5831.0
1467	19441797	7.0	3.0	9.0	11910.0
1468	19441797	18.0	7.0	4.0	16917.0
1469	19441797	19.0	7.0	0.0	9288.0
1470	19441797	14.0	7.0	9.0	19504.0
1471	19441797	4.0	5.0	2.0	10276.0
1472	19441797	15.0	5.0	1.0	8920.0
1473	19441797	16.0	8.0	0.0	8816.0
1474	19441797	15.0	8.0	1.0	8888.0
1475	19441797	18.0	7.0	4.0	11182.0
1476	19441797	24.0	5.0	3.0	10931.0
1477	19441797	18.0	5.0	2.0	8570.0
1478	19441797	18.0	4.0	2.0	10163.0
1479	19441797	25.0	9.0	0.0	11203.0
1480	19441797	21.0	6.0	2.0	10256.0
1481	19441797	21.0	6.0	0.0	9780.0
1482	19441797	17.0	6.0	4.0	9916.0
1483	19441797	9.0	5.0	12.0	11329.0
1484	19441797	16.0	3.0	0.0	7248.0
1485	19441797	18.0	12.0	1.0	9657.0
1486	19441797	21.0	10.0	3.0	12566.0
1487	19441797	8.0	8.0	1.0	7459.0
1488	19441797	24.0	4.0	4.0	12014.0
1489	19441797	14.0	9.0	2.0	12290.0
1490	19441797	15.0	3.0	0.0	6246.0
1491	19441797	22.0	5.0	2.0	11048.0
1492	19441797	23.0	8.0	2.0	11158.0
1493	19441797	19.0	4.0	2.0	12455.0
1494	19441797	31.0	6.0	10.0	16788.0
1495	19441797	15.0	2.0	1.0	8259.0
1496	19441797	7.0	6.0	3.0	7553.0
1497	19441797	11.0	7.0	3.0	9546.0
1498	19441797	13.0	10.0	5.0	10718.0
1499	19441797	13.0	7.0	4.0	10479.0
1500	45172467	13.0	1.0	11.0	13876.0
1501	45172467	15.0	5.0	10.0	15367.0
1502	45172467	15.0	13.0	17.0	19072.0
1503	45172467	4.0	9.0	3.0	7719.0
1504	45172467	11.0	6.0	8.0	11669.0
1505	45172467	7.0	6.0	10.0	12473.0
1506	45172467	5.0	4.0	8.0	13264.0
1507	45172467	6.0	7.0	8.0	13272.0
1508	45172467	15.0	12.0	11.0	14926.0
1509	45172467	6.0	6.0	11.0	12426.0
1510	45172467	14.0	8.0	8.0	13491.0
1511	45172467	11.0	7.0	7.0	12096.0
1512	45172467	7.0	2.0	10.0	11417.0
1513	45172467	12.0	5.0	9.0	14418.0
1514	45172467	3.0	7.0	2.0	7514.0
1515	45172467	13.0	8.0	6.0	14667.0
1516	45172467	5.0	2.0	7.0	10745.0
1517	45172467	5.0	8.0	7.0	11543.0
1518	45172467	3.0	4.0	1.0	6765.0
1519	45172467	9.0	5.0	7.0	15331.0
1520	45172467	15.0	2.0	12.0	15263.0
1521	45172467	5.0	3.0	8.0	11961.0
1522	45172467	11.0	2.0	9.0	16039.0
1523	45172467	13.0	5.0	12.0	14333.0
1524	45172467	5.0	5.0	5.0	11065.0
1525	45172467	8.0	4.0	4.0	12375.0
1526	45172467	9.0	3.0	5.0	11791.0
1527	45172467	8.0	11.0	9.0	15696.0
1528	45172467	10.0	4.0	9.0	14359.0
1529	45172467	5.0	7.0	16.0	13884.0
1530	45172467	3.0	1.0	1.0	7434.0
1531	45172467	11.0	4.0	12.0	14113.0
1532	45172467	11.0	5.0	13.0	16307.0
1533	45172467	4.0	7.0	6.0	11785.0
1534	45172467	6.0	4.0	9.0	11863.0
1535	45172467	7.0	2.0	15.0	15789.0
1536	45172467	5.0	7.0	8.0	11721.0
1537	45172467	6.0	3.0	3.0	9565.0
1538	45172467	12.0	13.0	17.0	21221.0
1539	45172467	6.0	8.0	13.0	14792.0
1540	45172467	11.0	2.0	12.0	14715.0
1541	45172467	6.0	5.0	7.0	11614.0
1542	45172467	15.0	7.0	6.0	12387.0
1543	45172467	5.0	4.0	7.0	11740.0
1544	45172467	10.0	2.0	7.0	10824.0
1545	45172467	8.0	4.0	8.0	10996.0
1546	45172467	1.0	6.0	3.0	9078.0
1547	45172467	9.0	6.0	10.0	16012.0
1548	45172467	5.0	1.0	8.0	8506.0
1549	45172467	9.0	4.0	9.0	13273.0
1550	45172467	3.0	2.0	8.0	10663.0
1551	45172467	16.0	6.0	7.0	18827.0
1552	45172467	1.0	4.0	5.0	9262.0
1553	45172467	6.0	4.0	7.0	10974.0
1554	45172467	9.0	8.0	11.0	14690.0
1555	45172467	0.0	5.0	1.0	5038.0
1556	45172467	4.0	6.0	4.0	12082.0
1557	45172467	12.0	2.0	5.0	10437.0
1558	45172467	6.0	9.0	8.0	11298.0
1559	45172467	3.0	5.0	7.0	10752.0
1560	45172467	14.0	8.0	17.0	20926.0
1561	45172467	2.0	5.0	11.0	13898.0
1562	45172467	10.0	7.0	14.0	14521.0
1563	45172467	11.0	11.0	7.0	13048.0
1564	45172467	7.0	8.0	6.0	11216.0
1565	45172467	1.0	7.0	6.0	9495.0
1566	45172467	16.0	4.0	11.0	18759.0
1567	45172467	11.0	3.0	14.0	14223.0
1568	45172467	1.0	7.0	10.0	11694.0
1569	45172467	15.0	10.0	18.0	22068.0
1570	45172467	4.0	3.0	19.0	13864.0
1571	45172467	17.0	6.0	11.0	14793.0
1572	45172467	6.0	9.0	7.0	10692.0
1573	45172467	5.0	6.0	10.0	14316.0
1574	45172467	6.0	13.0	11.0	17352.0
1575	45172467	14.0	5.0	8.0	13312.0
1576	45172467	16.0	6.0	13.0	16877.0
1577	45172467	6.0	3.0	12.0	16423.0
1578	45172467	3.0	8.0	11.0	13851.0
1579	45172467	6.0	9.0	12.0	16547.0
1580	45172467	10.0	2.0	10.0	13879.0
1581	45172467	6.0	3.0	8.0	14605.0
1582	45172467	8.0	5.0	11.0	12599.0
1583	45172467	6.0	1.0	4.0	8569.0
1584	45172467	8.0	6.0	11.0	13698.0
1585	45172467	3.0	5.0	5.0	12571.0
1586	45172467	6.0	2.0	6.0	8678.0
1587	45172467	8.0	7.0	3.0	12145.0
1588	45172467	8.0	8.0	4.0	11463.0
1589	45172467	12.0	10.0	7.0	13704.0
1590	45172467	13.0	7.0	11.0	13088.0
1591	45172467	10.0	6.0	6.0	13163.0
1592	45172467	10.0	9.0	13.0	18964.0
1593	45172467	3.0	1.0	7.0	10639.0
1594	45172467	7.0	4.0	14.0	15385.0
1595	45172467	5.0	5.0	4.0	11301.0
1596	45172467	4.0	1.0	3.0	8026.0
1597	45172467	2.0	5.0	9.0	12637.0
1598	45172467	5.0	3.0	11.0	16167.0
1599	45172467	9.0	9.0	7.0	14407.0
1600	65603849	1.0	0.0	0.0	3264.0
1601	65603849	21.0	5.0	4.0	11686.0
1602	65603849	12.0	5.0	1.0	10088.0
1603	65603849	9.0	6.0	6.0	12103.0
1604	65603849	9.0	4.0	5.0	10835.0
1605	65603849	16.0	8.0	7.0	13137.0
1606	65603849	0.0	5.0	4.0	5748.0
1607	65603849	5.0	6.0	7.0	11472.0
1608	65603849	2.0	3.0	1.0	7889.0
1609	65603849	2.0	10.0	5.0	13217.0
1610	65603849	9.0	6.0	17.0	21581.0
1611	65603849	9.0	5.0	6.0	16638.0
1612	65603849	4.0	5.0	5.0	13614.0
1613	65603849	2.0	6.0	3.0	6231.0
1614	65603849	1.0	2.0	3.0	7617.0
1615	65603849	2.0	7.0	2.0	8257.0
1616	65603849	8.0	3.0	11.0	12976.0
1617	65603849	8.0	17.0	3.0	15675.0
1618	65603849	13.0	11.0	4.0	16395.0
1619	65603849	7.0	2.0	4.0	9070.0
1620	65603849	24.0	10.0	4.0	12394.0
1621	65603849	4.0	9.0	2.0	8003.0
1622	65603849	7.0	9.0	5.0	9977.0
1623	65603849	6.0	11.0	5.0	10943.0
1624	65603849	7.0	6.0	3.0	9342.0
1625	65603849	8.0	10.0	6.0	14170.0
1626	65603849	3.0	6.0	6.0	11199.0
1627	65603849	12.0	10.0	7.0	13815.0
1628	65603849	5.0	4.0	2.0	10709.0
1629	65603849	8.0	7.0	7.0	11765.0
1630	65603849	6.0	7.0	3.0	12713.0
1631	65603849	4.0	6.0	5.0	10587.0
1632	65603849	2.0	2.0	3.0	9038.0
1633	65603849	4.0	9.0	2.0	10908.0
1634	65603849	11.0	4.0	2.0	13251.0
1635	65603849	6.0	2.0	8.0	10548.0
1636	65603849	6.0	2.0	3.0	9142.0
1637	65603849	8.0	3.0	3.0	9767.0
1638	65603849	8.0	4.0	1.0	8551.0
1639	65603849	9.0	8.0	4.0	12227.0
1640	65603849	4.0	13.0	4.0	9756.0
1641	65603849	7.0	4.0	5.0	10862.0
1642	65603849	8.0	15.0	12.0	20805.0
1643	65603849	6.0	9.0	2.0	6976.0
1644	65603849	5.0	11.0	4.0	7275.0
1645	65603849	14.0	6.0	6.0	13402.0
1646	65603849	5.0	4.0	1.0	9234.0
1647	65603849	17.0	13.0	4.0	11699.0
1648	65603849	18.0	8.0	10.0	18609.0
1649	65603849	6.0	1.0	3.0	7678.0
1650	65603849	11.0	10.0	6.0	13340.0
1651	65603849	9.0	8.0	4.0	12214.0
1652	65603849	4.0	9.0	5.0	11642.0
1653	65603849	5.0	2.0	1.0	11870.0
1654	65603849	6.0	7.0	3.0	6880.0
1655	65603849	3.0	5.0	3.0	9275.0
1656	65603849	8.0	8.0	7.0	12545.0
1657	65603849	15.0	6.0	10.0	14120.0
1658	65603849	29.0	11.0	6.0	16291.0
1659	65603849	9.0	3.0	5.0	12178.0
1660	65603849	5.0	5.0	6.0	12157.0
1661	65603849	18.0	12.0	11.0	16027.0
1662	65603849	8.0	2.0	2.0	8871.0
1663	65603849	10.0	9.0	9.0	13465.0
1664	65603849	10.0	6.0	6.0	11870.0
1665	65603849	1.0	3.0	5.0	8763.0
1666	65603849	13.0	13.0	1.0	11906.0
1667	65603849	6.0	5.0	8.0	12591.0
1668	65603849	2.0	5.0	1.0	5655.0
1669	65603849	20.0	7.0	6.0	18893.0
1670	65603849	13.0	12.0	5.0	16492.0
1671	65603849	12.0	7.0	11.0	16969.0
1672	65603849	9.0	1.0	21.0	15645.0
1673	65603849	6.0	1.0	6.0	10271.0
1674	65603849	4.0	13.0	2.0	8844.0
1675	65603849	6.0	5.0	14.0	18650.0
1676	65603849	24.0	15.0	5.0	12042.0
1677	65603849	5.0	6.0	0.0	6662.0
1678	65603849	2.0	5.0	4.0	7222.0
1679	65603849	6.0	3.0	6.0	8403.0
1680	65603849	9.0	10.0	3.0	9589.0
1681	65603849	4.0	7.0	0.0	12461.0
1682	65603849	7.0	7.0	7.0	12713.0
1683	65603849	15.0	5.0	4.0	15159.0
1684	65603849	12.0	11.0	9.0	15733.0
1685	65603849	13.0	9.0	7.0	13475.0
1686	65603849	8.0	9.0	6.0	12810.0
1687	65603849	0.0	0.0	0.0	1002.0
1688	65603849	7.0	3.0	6.0	7669.0
1689	65603849	6.0	6.0	1.0	7452.0
1690	65603849	7.0	9.0	1.0	9861.0
1691	65603849	5.0	2.0	3.0	10967.0
1692	65603849	15.0	6.0	3.0	11007.0
1693	65603849	8.0	11.0	5.0	13119.0
1694	65603849	6.0	10.0	11.0	11300.0
1695	65603849	8.0	3.0	8.0	9320.0
1696	65603849	11.0	5.0	9.0	11367.0
1697	65603849	0.0	0.0	0.0	997.0
1698	65603849	7.0	11.0	1.0	9907.0
1699	65603849	4.0	9.0	3.0	7053.0
1700	44008908	11.0	8.0	7.0	14070.0
1701	44008908	8.0	5.0	20.0	16319.0
1702	44008908	17.0	9.0	11.0	18481.0
1703	44008908	9.0	17.0	27.0	19941.0
1704	44008908	14.0	7.0	5.0	14963.0
1705	44008908	10.0	6.0	27.0	28552.0
1706	44008908	6.0	7.0	10.0	10564.0
1707	44008908	8.0	3.0	17.0	17346.0
1708	44008908	9.0	1.0	9.0	10751.0
1709	44008908	12.0	2.0	15.0	14637.0
1710	44008908	22.0	5.0	0.0	9939.0
1711	44008908	11.0	3.0	7.0	13485.0
1712	44008908	9.0	5.0	16.0	15580.0
1713	44008908	4.0	0.0	4.0	7635.0
1714	44008908	16.0	9.0	9.0	14730.0
1715	44008908	6.0	4.0	2.0	7796.0
1716	44008908	10.0	6.0	9.0	15077.0
1717	44008908	2.0	11.0	7.0	8930.0
1718	44008908	1.0	4.0	3.0	9469.0
1719	44008908	7.0	5.0	18.0	15263.0
1720	44008908	4.0	1.0	6.0	8031.0
1721	44008908	18.0	8.0	25.0	19444.0
1722	44008908	9.0	9.0	16.0	19295.0
1723	44008908	13.0	2.0	9.0	13173.0
1724	44008908	10.0	5.0	13.0	11992.0
1725	44008908	13.0	6.0	12.0	14137.0
1726	44008908	9.0	3.0	12.0	13968.0
1727	44008908	4.0	2.0	16.0	11391.0
1728	44008908	6.0	2.0	8.0	11375.0
1729	44008908	15.0	6.0	12.0	15333.0
1730	44008908	5.0	7.0	13.0	15397.0
1731	44008908	6.0	8.0	6.0	8691.0
1732	44008908	12.0	3.0	11.0	14523.0
1733	44008908	9.0	9.0	4.0	9364.0
1734	44008908	18.0	13.0	5.0	15020.0
1735	44008908	2.0	6.0	8.0	10838.0
1736	44008908	14.0	10.0	16.0	15933.0
1737	44008908	7.0	0.0	6.0	10152.0
1738	44008908	9.0	9.0	7.0	11462.0
1739	44008908	8.0	6.0	15.0	15665.0
1740	44008908	3.0	1.0	10.0	9273.0
1741	44008908	13.0	7.0	14.0	16386.0
1742	44008908	12.0	1.0	7.0	14531.0
1743	44008908	10.0	2.0	9.0	14217.0
1744	44008908	13.0	3.0	15.0	18231.0
1745	44008908	9.0	6.0	1.0	13401.0
1746	44008908	12.0	8.0	11.0	14383.0
1747	44008908	12.0	6.0	5.0	13876.0
1748	44008908	28.0	10.0	4.0	16077.0
1749	44008908	11.0	13.0	12.0	13331.0
1750	44008908	17.0	3.0	3.0	11968.0
1751	44008908	2.0	6.0	1.0	4843.0
1752	44008908	8.0	1.0	4.0	7970.0
1753	44008908	20.0	9.0	19.0	21297.0
1754	44008908	3.0	2.0	15.0	12337.0
1755	44008908	7.0	8.0	6.0	11438.0
1756	44008908	11.0	10.0	8.0	16408.0
1757	44008908	21.0	8.0	9.0	15225.0
1758	44008908	19.0	6.0	10.0	14836.0
1759	44008908	13.0	7.0	6.0	15042.0
1760	44008908	7.0	11.0	4.0	11623.0
1761	44008908	9.0	0.0	7.0	11220.0
1762	44008908	10.0	7.0	2.0	8368.0
1763	44008908	4.0	8.0	4.0	9790.0
1764	44008908	7.0	5.0	4.0	12793.0
1765	44008908	7.0	3.0	10.0	10212.0
1766	44008908	12.0	3.0	6.0	9926.0
1767	44008908	12.0	2.0	6.0	11833.0
1768	44008908	5.0	4.0	8.0	12625.0
1769	44008908	11.0	7.0	11.0	15526.0
1770	44008908	6.0	2.0	12.0	12386.0
1771	44008908	16.0	10.0	11.0	14664.0
1772	44008908	10.0	11.0	10.0	12798.0
1773	44008908	9.0	3.0	13.0	13028.0
1774	44008908	7.0	6.0	5.0	14454.0
1775	44008908	18.0	9.0	8.0	15019.0
1776	44008908	9.0	2.0	5.0	11048.0
1777	44008908	3.0	6.0	3.0	8122.0
1778	44008908	8.0	8.0	4.0	11869.0
1779	44008908	16.0	5.0	1.0	11863.0
1780	44008908	10.0	11.0	3.0	13630.0
1781	44008908	11.0	1.0	1.0	7079.0
1782	44008908	21.0	6.0	2.0	12493.0
1783	44008908	5.0	5.0	0.0	7005.0
1784	44008908	6.0	7.0	0.0	7097.0
1785	44008908	7.0	4.0	2.0	9504.0
1786	44008908	2.0	6.0	1.0	4890.0
1787	44008908	19.0	9.0	1.0	11031.0
1788	44008908	5.0	7.0	10.0	11711.0
1789	44008908	2.0	8.0	8.0	11879.0
1790	44008908	8.0	2.0	9.0	9987.0
1791	44008908	3.0	3.0	15.0	14832.0
1792	44008908	10.0	8.0	2.0	18272.0
1793	44008908	8.0	5.0	4.0	11197.0
1794	44008908	8.0	12.0	10.0	14685.0
1795	44008908	5.0	12.0	7.0	15095.0
1796	44008908	5.0	8.0	3.0	12386.0
1797	44008908	10.0	11.0	7.0	10608.0
1798	44008908	10.0	4.0	8.0	12252.0
1799	44008908	11.0	5.0	10.0	14839.0
1800	66550377	7.0	7.0	3.0	12704.0
1801	66550377	8.0	3.0	10.0	16217.0
1802	66550377	7.0	2.0	7.0	12180.0
1803	66550377	7.0	4.0	18.0	17586.0
1804	66550377	5.0	8.0	15.0	18288.0
1805	66550377	5.0	4.0	3.0	8296.0
1806	66550377	10.0	8.0	12.0	15202.0
1807	66550377	12.0	6.0	20.0	17871.0
1808	66550377	2.0	6.0	8.0	11391.0
1809	66550377	7.0	2.0	14.0	15051.0
1810	66550377	2.0	7.0	3.0	6899.0
1811	66550377	11.0	6.0	13.0	16222.0
1812	66550377	6.0	4.0	18.0	15321.0
1813	66550377	4.0	7.0	3.0	9835.0
1814	66550377	12.0	5.0	6.0	11930.0
1815	66550377	5.0	6.0	8.0	14600.0
1816	66550377	8.0	7.0	4.0	16661.0
1817	66550377	3.0	3.0	11.0	13506.0
1818	66550377	7.0	4.0	12.0	17098.0
1819	66550377	5.0	7.0	4.0	12409.0
1820	66550377	7.0	4.0	7.0	12825.0
1821	66550377	7.0	4.0	10.0	17708.0
1822	66550377	9.0	5.0	15.0	16225.0
1823	66550377	10.0	8.0	2.0	13332.0
1824	66550377	7.0	7.0	14.0	16563.0
1825	66550377	4.0	4.0	2.0	7132.0
1826	66550377	2.0	4.0	2.0	8179.0
1827	66550377	14.0	9.0	9.0	17093.0
1828	66550377	10.0	4.0	24.0	19673.0
1829	66550377	9.0	8.0	18.0	18856.0
1830	66550377	15.0	3.0	13.0	16302.0
1831	66550377	8.0	0.0	6.0	9047.0
1832	66550377	9.0	7.0	10.0	14361.0
1833	66550377	13.0	2.0	10.0	13511.0
1834	66550377	8.0	5.0	15.0	17263.0
1835	66550377	7.0	4.0	12.0	15133.0
1836	66550377	16.0	5.0	13.0	17143.0
1837	66550377	9.0	11.0	8.0	12839.0
1838	66550377	13.0	6.0	7.0	16766.0
1839	66550377	9.0	2.0	12.0	17698.0
1840	66550377	3.0	7.0	3.0	13154.0
1841	66550377	13.0	7.0	3.0	15480.0
1842	66550377	11.0	7.0	10.0	17632.0
1843	66550377	7.0	5.0	19.0	19807.0
1844	66550377	11.0	7.0	3.0	9739.0
1845	66550377	5.0	6.0	7.0	13639.0
1846	66550377	6.0	7.0	9.0	14914.0
1847	66550377	10.0	0.0	4.0	11035.0
1848	66550377	8.0	9.0	3.0	10035.0
1849	66550377	10.0	5.0	12.0	13513.0
1850	66550377	11.0	7.0	9.0	12454.0
1851	66550377	16.0	1.0	6.0	14485.0
1852	66550377	9.0	2.0	12.0	14931.0
1853	66550377	9.0	4.0	16.0	18294.0
1854	66550377	3.0	8.0	7.0	11816.0
1855	66550377	1.0	7.0	4.0	8954.0
1856	66550377	2.0	8.0	3.0	8704.0
1857	66550377	7.0	1.0	14.0	14136.0
1858	66550377	6.0	10.0	6.0	9142.0
1859	66550377	9.0	1.0	7.0	12176.0
1860	66550377	1.0	3.0	3.0	8964.0
1861	66550377	3.0	1.0	12.0	11866.0
1862	66550377	13.0	2.0	1.0	11707.0
1863	66550377	7.0	2.0	12.0	11311.0
1864	66550377	13.0	3.0	13.0	13181.0
1865	66550377	9.0	9.0	14.0	18214.0
1866	66550377	9.0	3.0	6.0	9544.0
1867	66550377	7.0	6.0	15.0	14538.0
1868	66550377	14.0	7.0	16.0	20655.0
1869	66550377	5.0	1.0	11.0	9674.0
1870	66550377	3.0	6.0	6.0	10157.0
1871	66550377	8.0	6.0	9.0	13544.0
1872	66550377	2.0	6.0	5.0	9810.0
1873	66550377	3.0	4.0	2.0	7329.0
1874	66550377	8.0	6.0	8.0	12555.0
1875	66550377	9.0	5.0	11.0	13312.0
1876	66550377	16.0	8.0	12.0	18702.0
1877	66550377	9.0	3.0	5.0	14544.0
1878	66550377	9.0	7.0	5.0	10499.0
1879	66550377	18.0	15.0	9.0	23837.0
1880	66550377	1.0	6.0	2.0	9311.0
1881	66550377	4.0	7.0	7.0	14081.0
1882	66550377	8.0	5.0	8.0	15890.0
1883	66550377	19.0	8.0	17.0	18760.0
1884	66550377	12.0	3.0	6.0	12627.0
1885	66550377	4.0	5.0	3.0	9399.0
1886	66550377	4.0	8.0	7.0	13231.0
1887	66550377	5.0	9.0	2.0	10801.0
1888	66550377	1.0	7.0	2.0	7943.0
1889	66550377	16.0	7.0	3.0	12235.0
1890	66550377	11.0	5.0	12.0	15524.0
1891	66550377	6.0	3.0	9.0	11790.0
1892	66550377	9.0	5.0	7.0	14067.0
1893	66550377	3.0	2.0	5.0	9042.0
1894	66550377	7.0	4.0	10.0	13277.0
1895	66550377	12.0	7.0	13.0	17839.0
1896	66550377	3.0	0.0	3.0	9494.0
1897	66550377	7.0	8.0	15.0	16528.0
1898	66550377	5.0	5.0	1.0	7925.0
1899	66550377	17.0	4.0	13.0	18920.0
1900	30064979	10.0	7.0	9.0	21781.0
1901	30064979	9.0	9.0	13.0	22356.0
1902	30064979	5.0	14.0	11.0	12320.0
1903	30064979	7.0	4.0	22.0	23766.0
1904	30064979	3.0	8.0	9.0	11494.0
1905	30064979	10.0	8.0	10.0	19025.0
1906	30064979	0.0	6.0	3.0	6536.0
1907	30064979	0.0	5.0	4.0	8429.0
1908	30064979	6.0	6.0	12.0	16421.0
1909	30064979	6.0	8.0	6.0	8510.0
1910	30064979	6.0	4.0	9.0	8383.0
1911	30064979	9.0	5.0	9.0	12723.0
1912	30064979	5.0	7.0	11.0	15184.0
1913	30064979	5.0	9.0	3.0	12621.0
1914	30064979	17.0	12.0	16.0	19382.0
1915	30064979	10.0	4.0	16.0	13684.0
1916	30064979	5.0	8.0	5.0	9759.0
1917	30064979	0.0	0.0	0.0	3870.0
1918	30064979	18.0	12.0	19.0	19704.0
1919	30064979	7.0	8.0	9.0	13004.0
1920	30064979	2.0	1.0	1.0	8005.0
1921	30064979	4.0	7.0	14.0	14692.0
1922	30064979	5.0	15.0	0.0	12957.0
1923	30064979	4.0	6.0	14.0	14398.0
1924	30064979	9.0	2.0	19.0	18725.0
1925	30064979	10.0	10.0	8.0	14455.0
1926	30064979	4.0	2.0	10.0	12334.0
1927	30064979	2.0	0.0	9.0	10237.0
1928	30064979	28.0	8.0	2.0	11153.0
1929	30064979	9.0	6.0	28.0	19452.0
1930	30064979	17.0	9.0	15.0	20902.0
1931	30064979	2.0	3.0	18.0	15630.0
1932	30064979	8.0	9.0	14.0	19126.0
1933	30064979	6.0	10.0	15.0	16298.0
1934	30064979	19.0	10.0	10.0	19699.0
1935	30064979	7.0	9.0	18.0	20019.0
1936	30064979	10.0	8.0	5.0	11129.0
1937	30064979	8.0	10.0	14.0	17930.0
1938	30064979	6.0	11.0	15.0	23395.0
1939	30064979	4.0	9.0	10.0	15057.0
1940	30064979	6.0	6.0	19.0	15400.0
1941	30064979	6.0	4.0	4.0	14361.0
1942	30064979	13.0	9.0	12.0	13022.0
1943	30064979	3.0	7.0	11.0	10513.0
1944	30064979	2.0	4.0	4.0	6484.0
1945	30064979	5.0	3.0	8.0	12278.0
1946	30064979	4.0	2.0	6.0	8281.0
1947	30064979	14.0	8.0	10.0	18005.0
1948	30064979	5.0	13.0	0.0	8965.0
1949	30064979	5.0	14.0	4.0	12587.0
1950	30064979	28.0	7.0	5.0	13257.0
1951	30064979	35.0	8.0	6.0	13343.0
1952	30064979	34.0	5.0	4.0	11038.0
1953	30064979	12.0	11.0	15.0	15038.0
1954	30064979	17.0	7.0	4.0	9938.0
1955	30064979	8.0	1.0	9.0	8375.0
1956	30064979	4.0	4.0	10.0	10484.0
1957	30064979	7.0	11.0	7.0	13026.0
1958	30064979	5.0	5.0	6.0	17791.0
1959	30064979	7.0	12.0	4.0	14312.0
1960	30064979	7.0	6.0	16.0	16603.0
1961	30064979	5.0	8.0	5.0	12775.0
1962	30064979	4.0	7.0	4.0	8935.0
1963	30064979	0.0	5.0	17.0	13523.0
1964	30064979	9.0	6.0	1.0	11208.0
1965	30064979	20.0	8.0	15.0	20346.0
1966	30064979	10.0	12.0	17.0	17475.0
1967	30064979	6.0	5.0	9.0	17881.0
1968	30064979	6.0	7.0	1.0	7316.0
1969	30064979	13.0	10.0	19.0	17628.0
1970	30064979	5.0	6.0	21.0	17067.0
1971	30064979	4.0	2.0	10.0	12402.0
1972	30064979	12.0	7.0	4.0	13295.0
1973	30064979	8.0	6.0	13.0	14900.0
1974	30064979	9.0	4.0	5.0	14048.0
1975	30064979	4.0	8.0	4.0	11417.0
1976	30064979	2.0	3.0	10.0	11056.0
1977	30064979	5.0	2.0	4.0	11155.0
1978	30064979	8.0	10.0	6.0	15437.0
1979	30064979	7.0	6.0	6.0	15674.0
1980	30064979	5.0	7.0	5.0	14477.0
1981	30064979	20.0	8.0	3.0	16807.0
1982	30064979	7.0	4.0	9.0	11980.0
1983	30064979	10.0	7.0	14.0	19246.0
1984	30064979	2.0	10.0	1.0	11105.0
1985	30064979	7.0	12.0	18.0	14389.0
1986	30064979	7.0	6.0	7.0	13007.0
1987	30064979	8.0	3.0	10.0	12715.0
1988	30064979	6.0	3.0	7.0	8397.0
1989	30064979	7.0	4.0	10.0	13684.0
1990	30064979	8.0	7.0	14.0	17752.0
1991	30064979	8.0	8.0	1.0	8339.0
1992	30064979	4.0	8.0	12.0	15557.0
1993	30064979	4.0	6.0	5.0	8385.0
1994	30064979	6.0	7.0	11.0	18435.0
1995	30064979	7.0	9.0	20.0	20561.0
1996	30064979	8.0	6.0	11.0	15143.0
1997	30064979	7.0	6.0	0.0	9941.0
1998	30064979	6.0	7.0	6.0	13869.0
[truncated: 94,101 more rows]
